# Supplementary material for: Catalytic hydrosilylation of olefins with organolanthanides: a DFT study. Part I: Hydrosilylation of propene by SiH4
Source: Royal Society of Chemistry journal article supplement (doi:10.1039/c0dt00329h), 2010-01-01
Supplement: c0dt00329h.pdf [file c0dt00329h.pdf]

# Catalytic hydrosilylation of olefins with organolanthanides : a DFT study. Part I : Hydrosilylation of propene by SiH<sub>4</sub>

N.Barros<sup>a</sup>, O.Eisenstein<sup>b</sup> and L.Maron<sup>c,\*</sup>

<sup>a</sup> LAMPS, Université de Perpignan Via Domitia, 52, avenue Paul Alduy, 66860 Perpignan cedex, France

<sup>b</sup> Institut Charles Gerhardt CNRS, UMR 5253 CNRS-UM2-ENSCM-UM1, Université Montpellier 2, 34095

Montpellier cedex 05, France

<sup>c</sup> University of Toulouse, INSA, UPS, LPCNO, 135 avenue de Ranguel, F-31077 Toulouse (France) and CNRS, LPCNO UMR 5215, F-31077 Toulouse, France

## Table of contents

|                                                                                                                                               |           |
|-----------------------------------------------------------------------------------------------------------------------------------------------|-----------|
| <b>Cp<sub>2</sub>SmH (hydride complex)</b> .....                                                                                              | <b>2</b>  |
| Propene.....                                                                                                                                  | 2         |
| SiH <sub>4</sub> .....                                                                                                                        | 2         |
| Cp <sub>2</sub> SmH + propene : 1,2 insertion.....                                                                                            | 3         |
| Cp <sub>2</sub> SmH + propene : 2,1 insertion.....                                                                                            | 6         |
| Cp <sub>2</sub> SmH + propene : allylic activation.....                                                                                       | 9         |
| Cp <sub>2</sub> SmH + propene : vinylic activation.....                                                                                       | 13        |
| Cp <sub>2</sub> SmH + SiH <sub>4</sub> : Si-H activation (Si at α position at the TS).....                                                    | 17        |
| Cp <sub>2</sub> SmH + SiH <sub>4</sub> : Si-H activation (Si at β position at the TS).....                                                    | 21        |
| <b>Cp<sub>2</sub>SmCH<sub>2</sub>CH<sub>2</sub>CH<sub>3</sub> (propyl complex)</b> .....                                                      | <b>23</b> |
| Cp <sub>2</sub> SmCH <sub>2</sub> CH <sub>2</sub> CH <sub>3</sub> + propene : 1,2 insertion.....                                              | 24        |
| Cp <sub>2</sub> SmCH <sub>2</sub> CH <sub>2</sub> CH <sub>3</sub> + propene : 2,1 insertion.....                                              | 27        |
| Cp <sub>2</sub> SmCH <sub>2</sub> CH <sub>2</sub> CH <sub>3</sub> + propene : allylic activation.....                                         | 30        |
| Cp <sub>2</sub> SmCH <sub>2</sub> CH <sub>2</sub> CH <sub>3</sub> + propene : vinylic activation.....                                         | 33        |
| Cp <sub>2</sub> SmCH <sub>2</sub> CH <sub>2</sub> CH <sub>3</sub> + SiH <sub>4</sub> : Si-H activation (Si at α position at the TS).....      | 36        |
| Cp <sub>2</sub> SmCH <sub>2</sub> CH <sub>2</sub> CH <sub>3</sub> + SiH <sub>4</sub> : Si-H activation (Si at β position at the TS).....      | 39        |
| <b>Cp<sub>2</sub>SmCH<sub>2</sub>-CH=CH<sub>2</sub> (π-allylic complex)</b> .....                                                             | <b>41</b> |
| Cp <sub>2</sub> SmCH <sub>2</sub> -CH=CH <sub>2</sub> + propene : 1,2 insertion.....                                                          | 42        |
| Cp <sub>2</sub> SmCH <sub>2</sub> -CH=CH <sub>2</sub> + SiH <sub>4</sub> : Si-H activation (Si at α position at the TS).....                  | 45        |
| Cp <sub>2</sub> SmCH <sub>2</sub> -CH=CH <sub>2</sub> + SiH <sub>4</sub> : Si-H activation (Si at β position at the TS).....                  | 46        |
| <b>Cp<sub>2</sub>SmSiH<sub>3</sub> (silyl complex)</b> .....                                                                                  | <b>48</b> |
| Cp <sub>2</sub> SmSiH <sub>3</sub> + propene : 1,2 insertion.....                                                                             | 49        |
| Cp <sub>2</sub> SmSiH <sub>3</sub> + propene : 2,1 insertion.....                                                                             | 52        |
| Cp <sub>2</sub> SmSiH <sub>3</sub> + propene : allylic activation.....                                                                        | 55        |
| Cp <sub>2</sub> SmSiH <sub>3</sub> + SiH <sub>4</sub> : Si-H activation (Si at α position at the TS).....                                     | 56        |
| Cp <sub>2</sub> SmSiH <sub>3</sub> + SiH <sub>4</sub> : Si-H activation (Si at β position at the TS).....                                     | 57        |
| <b>Cp<sub>2</sub>SmCH<sub>2</sub>CH(CH<sub>3</sub>)SiH<sub>3</sub></b> .....                                                                  | <b>61</b> |
| Cp <sub>2</sub> SmCH <sub>2</sub> CH(CH <sub>3</sub> )SiH <sub>3</sub> + propene : 1,2 insertion.....                                         | 62        |
| Cp <sub>2</sub> SmCH <sub>2</sub> CH(CH <sub>3</sub> )SiH <sub>3</sub> + propene : allylic activation.....                                    | 63        |
| Cp <sub>2</sub> SmCH <sub>2</sub> CH(CH <sub>3</sub> )SiH <sub>3</sub> + SiH <sub>4</sub> : Si-H activation (Si at α position at the TS)..... | 65        |
| Cp <sub>2</sub> SmCH <sub>2</sub> CH(CH <sub>3</sub> )SiH <sub>3</sub> + SiH <sub>4</sub> : Si-H activation (Si at β position at the TS)..... | 68        |
| <b>Cp<sub>2</sub>SmCH(CH<sub>3</sub>)CH<sub>2</sub>SiH<sub>3</sub></b> .....                                                                  | <b>69</b> |
| Cp <sub>2</sub> SmCH(CH <sub>3</sub> )CH <sub>2</sub> SiH <sub>3</sub> + SiH <sub>4</sub> : Si-H activation (Si at α position at the TS)..... | 70        |

**Cp<sub>2</sub>SmH (hydride complex)**

|    |           |           |           |
|----|-----------|-----------|-----------|
| Sm | -0.012028 | -0.360917 | -0.032744 |
| C  | 2.651518  | 0.166910  | 0.400364  |
| C  | 2.628053  | -1.035725 | -0.347190 |
| C  | 2.153089  | -0.727706 | -1.648215 |
| C  | 1.896905  | 0.667000  | -1.707315 |
| C  | 2.201572  | 1.220440  | -0.439044 |
| C  | -2.676905 | 0.192820  | 0.357255  |
| C  | -2.204661 | 1.238468  | -0.479754 |
| C  | -1.885825 | 0.676625  | -1.740853 |
| C  | -2.155637 | -0.715416 | -1.679663 |
| C  | -2.653000 | -1.013341 | -0.384672 |
| H  | 2.995320  | 0.268995  | 1.424094  |
| H  | 2.924893  | -2.013303 | 0.009195  |
| H  | 2.049911  | -1.428719 | -2.469134 |
| H  | 1.563384  | 1.217923  | -2.578639 |
| H  | 2.150921  | 2.271424  | -0.175649 |
| H  | -3.035485 | 0.302623  | 1.375108  |
| H  | -2.148484 | 2.290123  | -0.220217 |
| H  | -1.534462 | 1.220687  | -2.609468 |
| H  | -2.046267 | -1.421049 | -2.495806 |
| H  | -2.964166 | -1.986614 | -0.028729 |
| H  | -0.026518 | -2.217018 | 0.902785  |

E = -422.333039019

G = -422.201852

**Propene**

|   |           |           |           |
|---|-----------|-----------|-----------|
| C | 0.095565  | 0.170828  | 0.183346  |
| C | -0.104737 | -0.168928 | 1.456348  |
| C | 1.392867  | 0.035693  | -0.552125 |
| H | 0.694544  | -0.582907 | 2.067684  |
| H | -1.072368 | -0.046697 | 1.934624  |
| H | -0.738118 | 0.581751  | -0.387801 |
| H | 1.284825  | -0.615258 | -1.428733 |
| H | 1.739273  | 1.007406  | -0.925764 |
| H | 2.176441  | -0.381887 | 0.087088  |

E = -117.868522821

G = -117.813606

**SiH<sub>4</sub>**

|    |           |           |           |
|----|-----------|-----------|-----------|
| Si | 0.039477  | -0.034937 | -0.040692 |
| H  | -0.049434 | 0.074062  | 1.444033  |
| H  | 1.471253  | 0.032766  | -0.459854 |
| H  | -0.546669 | -1.335733 | -0.480347 |
| H  | -0.716009 | 1.088593  | -0.667068 |

E = -6.28910490369

G = -6.279886

**Cp<sub>2</sub>SmH + propene : 1,2 insertion**

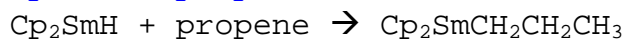

*Adduct of propene on Cp<sub>2</sub>SmH*

|    |           |           |           |
|----|-----------|-----------|-----------|
| C  | 2.591307  | 3.340037  | -0.838827 |
| C  | 2.987296  | 3.928965  | 0.386317  |
| C  | 1.912384  | 4.729113  | 0.854666  |
| C  | 0.854010  | 4.638534  | -0.081398 |
| C  | 1.270112  | 3.772442  | -1.124486 |
| Sm | 0.990098  | 2.124591  | 1.030419  |
| C  | 0.659288  | -0.536691 | 1.730788  |
| C  | 1.875041  | -0.495729 | 0.997890  |
| C  | 1.562508  | -0.179551 | -0.346458 |
| C  | 0.155985  | -0.017992 | -0.441743 |
| C  | -0.403202 | -0.247746 | 0.840559  |
| H  | -0.928802 | 2.705015  | 1.601540  |
| C  | 0.743322  | 2.482127  | 4.161658  |
| C  | 2.035367  | 2.303814  | 3.835543  |
| C  | 0.117401  | 3.779715  | 4.551920  |
| H  | 1.913588  | 5.337776  | 1.751632  |
| H  | -0.100248 | 5.144274  | -0.014855 |
| H  | 0.696428  | 3.521337  | -2.009388 |
| H  | 3.202715  | 2.702555  | -1.466365 |
| H  | 3.959863  | 3.826111  | 0.855557  |
| H  | 2.269165  | -0.107824 | -1.164553 |
| H  | -0.399319 | 0.201030  | -1.346680 |
| H  | -1.455069 | -0.213776 | 1.091523  |
| H  | 0.555537  | -0.798754 | 2.777997  |
| H  | 2.863645  | -0.720670 | 1.383626  |
| H  | 0.830599  | 4.607310  | 4.512509  |
| H  | -0.279088 | 3.710714  | 5.572403  |
| H  | -0.726159 | 3.998463  | 3.888925  |
| H  | 0.080999  | 1.614955  | 4.164058  |
| H  | 2.742706  | 3.130247  | 3.846605  |
| H  | 2.434596  | 1.309789  | 3.635917  |

E = -540.217940584

G = -540.013679

*Transition state*

|    |           |           |           |
|----|-----------|-----------|-----------|
| C  | 2.335456  | 3.403161  | -0.987212 |
| C  | 3.098020  | 3.827942  | 0.128885  |
| C  | 2.256225  | 4.610001  | 0.962026  |
| C  | 0.973404  | 4.666173  | 0.363054  |
| C  | 1.020914  | 3.914392  | -0.838677 |
| Sm | 1.257175  | 2.033596  | 1.136292  |
| C  | 0.809077  | -0.640778 | 1.721732  |
| C  | 2.019555  | -0.621799 | 0.982803  |
| C  | 1.716489  | -0.229261 | -0.344503 |
| C  | 0.317423  | -0.002581 | -0.423819 |
| C  | -0.243637 | -0.263338 | 0.852204  |
| H  | -0.497774 | 2.564230  | 2.130664  |
| C  | 0.406400  | 2.565611  | 3.927497  |
| C  | 1.736175  | 2.263122  | 3.787254  |
| C  | -0.093225 | 3.942956  | 4.255681  |
| H  | 2.557278  | 5.118751  | 1.870481  |
| H  | 0.114727  | 5.205097  | 0.742600  |
| H  | 0.206154  | 3.789606  | -1.542934 |
| H  | 2.700495  | 2.817343  | -1.822513 |
| H  | 4.153231  | 3.634144  | 0.289221  |
| H  | 2.421577  | -0.154240 | -1.163956 |
| H  | -0.231451 | 0.275436  | -1.316412 |
| H  | -1.293043 | -0.204539 | 1.111554  |
| H  | 0.700059  | -0.936404 | 2.758822  |
| H  | 2.999147  | -0.903564 | 1.354162  |
| H  | 0.555239  | 4.716394  | 3.835485  |
| H  | -0.094278 | 4.066713  | 5.347194  |
| H  | -1.108880 | 4.102524  | 3.890238  |
| H  | -0.288846 | 1.751459  | 4.117004  |
| H  | 2.487047  | 3.051734  | 3.800518  |
| H  | 2.085589  | 1.236989  | 3.888197  |

E = -540.215011257

G = -540.007831

$Cp_2SmCH_2CH_2CH_3$  (*propyl complex*)

|    |           |           |           |
|----|-----------|-----------|-----------|
| C  | 2.280756  | 3.420334  | -1.116375 |
| C  | 3.199026  | 3.738073  | -0.082524 |
| C  | 2.524034  | 4.536137  | 0.876929  |
| C  | 1.186082  | 4.698738  | 0.442401  |
| C  | 1.034349  | 4.008083  | -0.789481 |
| Sm | 1.402965  | 2.020697  | 1.093000  |
| C  | 0.908540  | -0.613524 | 1.768246  |
| C  | 2.085613  | -0.647353 | 0.982422  |
| C  | 1.739164  | -0.298224 | -0.348705 |
| C  | 0.344250  | -0.046637 | -0.384721 |
| C  | -0.168546 | -0.239881 | 0.923807  |
| H  | -0.365473 | 2.721623  | 2.561235  |
| C  | 0.119826  | 2.599202  | 3.591580  |
| C  | 1.617189  | 2.352129  | 3.507504  |
| C  | -0.321354 | 3.847509  | 4.358101  |
| H  | 2.961492  | 4.967240  | 1.768372  |
| H  | 0.423190  | 5.287203  | 0.939706  |
| H  | 0.137943  | 3.979034  | -1.399047 |
| H  | 2.500734  | 2.851962  | -2.012483 |
| H  | 4.248976  | 3.466679  | -0.059161 |
| H  | 2.412257  | -0.271996 | -1.197848 |
| H  | -0.233184 | 0.207245  | -1.266446 |
| H  | -1.210180 | -0.166158 | 1.216543  |
| H  | 0.840264  | -0.855222 | 2.821414  |
| H  | 3.073902  | -0.926352 | 1.331167  |
| H  | 0.167237  | 4.741385  | 3.955814  |
| H  | -0.030793 | 3.759360  | 5.409660  |
| H  | -1.405682 | 4.003938  | 4.313502  |
| H  | -0.402745 | 1.716884  | 3.980892  |
| H  | 2.183924  | 3.243654  | 3.798295  |
| H  | 1.928973  | 1.515677  | 4.138318  |

E = -540.244424824

G = -540.032604

**Cp<sub>2</sub>SmH + propene : 2,1 insertion**

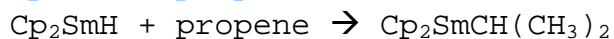

*Adduct of propene on Cp<sub>2</sub>SmH*

|    |           |           |           |
|----|-----------|-----------|-----------|
| C  | 1.747280  | 3.110031  | -1.746594 |
| C  | 2.861873  | 3.525544  | -0.980285 |
| C  | 2.405975  | 4.442810  | 0.002279  |
| C  | 1.006538  | 4.591056  | -0.154027 |
| C  | 0.598207  | 3.762767  | -1.232645 |
| Sm | 1.283245  | 2.016751  | 0.738891  |
| C  | -1.345149 | 1.389710  | 1.108364  |
| C  | -1.113658 | 2.480356  | 1.987124  |
| C  | -0.270382 | 2.028202  | 3.029552  |
| C  | 0.012602  | 0.655113  | 2.798142  |
| C  | -0.655999 | 0.259807  | 1.614571  |
| C  | 3.533877  | 0.866946  | 2.719475  |
| C  | 4.045119  | 1.498914  | 1.649354  |
| H  | 4.031608  | 1.027498  | 0.665991  |
| H  | 1.705001  | 0.309934  | -0.376456 |
| H  | 0.587338  | 0.004326  | 3.446712  |
| H  | -0.646932 | -0.729177 | 1.176195  |
| H  | -1.972963 | 1.406687  | 0.224931  |
| H  | -1.533870 | 3.474529  | 1.893363  |
| H  | 0.054898  | 2.615256  | 3.881718  |
| H  | 0.367302  | 5.252098  | 0.419118  |
| H  | -0.408927 | 3.681304  | -1.624858 |
| H  | 1.771322  | 2.419111  | -2.579050 |
| H  | 3.889675  | 3.223892  | -1.144945 |
| H  | 3.025589  | 4.977282  | 0.714462  |
| H  | 4.550280  | 2.458423  | 1.740587  |
| H  | 3.083647  | -0.115380 | 2.566937  |
| C  | 3.592838  | 1.366449  | 4.128527  |
| H  | 4.214800  | 0.695989  | 4.734271  |
| H  | 4.019287  | 2.371656  | 4.187250  |
| H  | 2.601329  | 1.376365  | 4.593496  |

E = -540.217437344

G = -540.011683

*Transition state*

|    |           |           |           |
|----|-----------|-----------|-----------|
| C  | 2.193203  | 3.255490  | -1.181829 |
| C  | 3.066066  | 3.806452  | -0.210747 |
| C  | 2.307840  | 4.663161  | 0.627037  |
| C  | 0.963826  | 4.635546  | 0.181727  |
| C  | 0.893505  | 3.763199  | -0.937010 |
| Sm | 1.366231  | 2.111112  | 1.187661  |
| C  | -1.254702 | 1.396112  | 0.993113  |
| C  | -1.214627 | 2.304601  | 2.080857  |
| C  | -0.531409 | 1.675222  | 3.151121  |
| C  | -0.157020 | 0.374227  | 2.725855  |
| C  | -0.603440 | 0.200668  | 1.392575  |
| C  | 3.316210  | 0.843916  | 2.534910  |
| C  | 3.582171  | 0.342534  | 1.283519  |
| H  | 3.447684  | -0.712564 | 1.078645  |
| H  | 2.174004  | 0.569510  | 0.051522  |
| H  | 0.337184  | -0.376021 | 3.331229  |
| H  | -0.492421 | -0.694479 | 0.794018  |
| H  | -1.734731 | 1.569433  | 0.037103  |
| H  | -1.659292 | 3.292573  | 2.101682  |
| H  | -0.374185 | 2.093801  | 4.139297  |
| H  | 0.144021  | 5.212198  | 0.593359  |
| H  | 0.007723  | 3.554323  | -1.525375 |
| H  | 2.473679  | 2.583700  | -1.982609 |
| H  | 4.137004  | 3.647534  | -0.158415 |
| H  | 2.694627  | 5.269936  | 1.438441  |
| H  | 4.239644  | 0.871183  | 0.596927  |
| H  | 2.807058  | 0.196870  | 3.246145  |
| C  | 3.694739  | 2.205113  | 3.037267  |
| H  | 4.108214  | 2.153193  | 4.050242  |
| H  | 4.422880  | 2.703409  | 2.390790  |
| H  | 2.836000  | 2.918600  | 3.150922  |

E = -540.212122322

G = -540.003145

$Cp_2SmCH(CH_3)_2$

|    |           |           |           |
|----|-----------|-----------|-----------|
| C  | 2.153006  | 3.201317  | -1.121562 |
| C  | 3.040630  | 3.761565  | -0.167516 |
| C  | 2.298097  | 4.652586  | 0.645505  |
| C  | 0.954155  | 4.647417  | 0.194224  |
| C  | 0.865695  | 3.751363  | -0.902295 |
| Sm | 1.329252  | 2.124877  | 1.307295  |
| C  | -1.283833 | 1.366409  | 1.017500  |
| C  | -1.293365 | 2.342266  | 2.043195  |
| C  | -0.644913 | 1.789875  | 3.179415  |
| C  | -0.242760 | 0.468755  | 2.857296  |
| C  | -0.629903 | 0.209977  | 1.519017  |
| C  | 3.131612  | 0.857438  | 2.326843  |
| C  | 3.624538  | 0.431463  | 0.975093  |
| H  | 3.834522  | -0.641553 | 0.917208  |
| H  | 2.873239  | 0.580834  | 0.126818  |
| H  | 0.248108  | -0.228130 | 3.523873  |
| H  | -0.494600 | -0.725713 | 0.987779  |
| H  | -1.730864 | 1.471137  | 0.035813  |
| H  | -1.747608 | 3.324092  | 1.982334  |
| H  | -0.527410 | 2.273449  | 4.143009  |
| H  | 0.147113  | 5.254177  | 0.587829  |
| H  | -0.022124 | 3.550640  | -1.490445 |
| H  | 2.423330  | 2.516218  | -1.917264 |
| H  | 4.106347  | 3.578552  | -0.104231 |
| H  | 2.697206  | 5.269930  | 1.442394  |
| H  | 4.510308  | 0.976069  | 0.622962  |
| H  | 2.920546  | 0.035417  | 3.005789  |
| C  | 3.641475  | 2.097934  | 2.997210  |
| H  | 3.853940  | 1.950892  | 4.061066  |
| H  | 4.529088  | 2.539200  | 2.525257  |
| H  | 2.898385  | 2.968136  | 3.015199  |

E = -540.232819484

G = -540.021196



**Cp<sub>2</sub>SmH + propene : allylic activation**

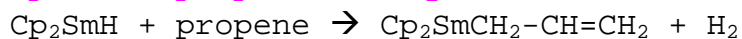

*Adduct of propene on Cp<sub>2</sub>SmH*

|    |           |           |           |
|----|-----------|-----------|-----------|
| C  | 0.661625  | -0.581834 | -1.600776 |
| C  | -0.732105 | -0.823859 | -1.662565 |
| C  | -1.365355 | 0.373236  | -2.085667 |
| C  | -0.364906 | 1.360286  | -2.272269 |
| C  | 0.887429  | 0.768365  | -1.978849 |
| Sm | 0.003192  | -0.490052 | -4.285043 |
| C  | -0.054436 | -3.019702 | -5.402539 |
| C  | -1.254711 | -2.899845 | -4.661122 |
| C  | -2.072633 | -1.936304 | -5.306534 |
| C  | -1.382763 | -1.469464 | -6.454286 |
| C  | -0.134003 | -2.134487 | -6.509451 |
| H  | -0.305287 | 1.261827  | -5.373717 |
| C  | 2.640032  | 1.038846  | -6.851920 |
| C  | 2.712184  | 0.709502  | -5.397959 |
| C  | 2.936235  | -0.511963 | -4.882554 |
| H  | 1.845985  | 1.275445  | -1.986838 |
| H  | 1.414491  | -1.289017 | -1.269433 |
| H  | -1.229799 | -1.749543 | -1.399414 |
| H  | -2.432639 | 0.520245  | -2.206172 |
| H  | -0.531159 | 2.384480  | -2.578819 |
| H  | 0.611467  | -2.017564 | -7.287713 |
| H  | 0.758977  | -3.704348 | -5.187463 |
| H  | -1.517416 | -3.469786 | -3.777925 |
| H  | -3.070208 | -1.641795 | -5.000947 |
| H  | -1.748296 | -0.740196 | -7.165184 |
| H  | 1.681608  | 1.518759  | -7.075643 |
| H  | 3.099239  | -1.376680 | -5.522083 |
| H  | 3.050600  | -0.658453 | -3.808861 |
| H  | 2.586174  | 1.549793  | -4.713434 |
| H  | 3.431643  | 1.752102  | -7.112681 |
| H  | 2.752726  | 0.150913  | -7.479529 |

E = -540.217923630

G = -540.014341

*Transition state*

|    |           |           |           |
|----|-----------|-----------|-----------|
| C  | 1.034625  | 0.021193  | -1.865953 |
| C  | -0.188974 | -0.686763 | -1.791306 |
| C  | -1.219200 | 0.169824  | -2.265430 |
| C  | -0.629447 | 1.403872  | -2.630657 |
| C  | 0.765078  | 1.309417  | -2.392572 |
| Sm | 0.240009  | -0.437600 | -4.478721 |
| C  | -0.087347 | -2.949149 | -5.586956 |
| C  | -1.220753 | -2.741561 | -4.763522 |
| C  | -2.010876 | -1.722261 | -5.355431 |
| C  | -1.368018 | -1.304463 | -6.546895 |
| C  | -0.176327 | -2.057469 | -6.687213 |
| H  | -0.209039 | 1.334051  | -5.609956 |
| C  | 2.191749  | 0.878160  | -6.017482 |
| C  | 2.901618  | 0.153314  | -4.976326 |
| C  | 2.951798  | -1.203612 | -4.826029 |
| H  | 1.487121  | 2.104076  | -2.540132 |
| H  | 2.002171  | -0.349107 | -1.547841 |
| H  | -0.323888 | -1.686975 | -1.396301 |
| H  | -2.276195 | -0.065648 | -2.300099 |
| H  | -1.152237 | 2.272934  | -3.009594 |
| H  | 0.516916  | -1.999509 | -7.518681 |
| H  | 0.685845  | -3.691514 | -5.426037 |
| H  | -1.462210 | -3.291700 | -3.861637 |
| H  | -2.958983 | -1.353678 | -4.981929 |
| H  | -1.734312 | -0.554932 | -7.237057 |
| H  | 0.870043  | 1.224128  | -5.805592 |
| H  | 2.647294  | -1.873384 | -5.627736 |
| H  | 3.467161  | -1.651274 | -3.982852 |
| H  | 3.312045  | 0.756420  | -4.165233 |
| H  | 2.533983  | 1.904444  | -6.155967 |
| H  | 2.122611  | 0.351315  | -6.973205 |

E = -540.206888511

G = -540.000399

*Adduct of H<sub>2</sub> on Cp<sub>2</sub>SmCH<sub>2</sub>-CH=CH<sub>2</sub>*

|    |           |           |           |
|----|-----------|-----------|-----------|
| C  | 1.137548  | 0.170318  | -1.925403 |
| C  | 0.015015  | -0.685229 | -1.796871 |
| C  | -1.128845 | 0.021956  | -2.250570 |
| C  | -0.709238 | 1.307276  | -2.670123 |
| C  | 0.694169  | 1.398510  | -2.471972 |
| Sm | 0.348811  | -0.452435 | -4.502358 |
| C  | -0.128096 | -2.927513 | -5.639315 |
| C  | -1.251882 | -2.658418 | -4.819136 |
| C  | -1.984115 | -1.597833 | -5.411610 |
| C  | -1.312625 | -1.216105 | -6.600374 |
| C  | -0.164156 | -2.032703 | -6.738971 |
| H  | -0.620546 | 1.580821  | -5.626932 |
| C  | 2.361368  | 0.714135  | -5.944971 |
| C  | 2.997409  | 0.021229  | -4.909654 |
| C  | 2.869321  | -1.343528 | -4.642364 |
| H  | 1.308088  | 2.270763  | -2.662952 |
| H  | 2.153163  | -0.069421 | -1.636093 |
| H  | 0.020734  | -1.685242 | -1.378654 |
| H  | -2.147496 | -0.346512 | -2.247483 |
| H  | -1.354694 | 2.100368  | -3.030309 |
| H  | 0.537958  | -2.008887 | -7.564161 |
| H  | 0.605235  | -3.708061 | -5.475935 |
| H  | -1.525717 | -3.194899 | -3.918218 |
| H  | -2.916988 | -1.185156 | -5.045697 |
| H  | -1.642534 | -0.458614 | -7.302277 |
| H  | 0.115127  | 1.618846  | -5.823811 |
| H  | 2.640034  | -2.028521 | -5.457981 |
| H  | 3.386351  | -1.778552 | -3.793277 |
| H  | 3.448076  | 0.632521  | -4.124923 |
| H  | 2.536054  | 1.779482  | -6.061606 |
| H  | 2.094762  | 0.180928  | -6.858937 |

E = -540.222897155

G = -540.016555

$Cp_2SmCH_2-CH=CH_2$  ( $\pi$ -allylic complex)

|    |           |           |           |
|----|-----------|-----------|-----------|
| C  | 0.524990  | -0.334951 | 2.617508  |
| C  | 0.002141  | 0.974978  | 2.742967  |
| C  | 0.808881  | 1.845644  | 1.965591  |
| C  | 1.835874  | 1.073366  | 1.366256  |
| C  | 1.655676  | -0.276023 | 1.762510  |
| Sm | -0.456746 | 0.276938  | 0.110233  |
| C  | -0.017478 | -0.541503 | -2.500228 |
| C  | -1.203288 | 0.230043  | -2.574118 |
| C  | -0.867698 | 1.578926  | -2.300813 |
| C  | 0.528345  | 1.642937  | -2.058980 |
| C  | 1.054270  | 0.331426  | -2.182304 |
| C  | -2.130667 | -1.783420 | 0.454996  |
| H  | 0.691892  | 2.920731  | 1.884368  |
| H  | 2.633583  | 1.451835  | 0.738542  |
| H  | 2.299001  | -1.108036 | 1.498080  |
| H  | 0.147070  | -1.222083 | 3.110834  |
| H  | -0.846356 | 1.267281  | 3.349528  |
| H  | -1.551600 | 2.420115  | -2.314559 |
| H  | 1.100459  | 2.541434  | -1.858947 |
| H  | 2.098070  | 0.053495  | -2.093331 |
| H  | 0.062711  | -1.605398 | -2.693145 |
| H  | -2.189072 | -0.141355 | -2.828210 |
| H  | -2.319045 | -1.864096 | -0.616834 |
| H  | -1.874869 | -2.712224 | 0.955300  |
| C  | -2.729543 | -0.747556 | 1.178806  |
| C  | -3.063687 | 0.512467  | 0.672546  |
| H  | -2.713558 | -0.844158 | 2.266675  |
| H  | -3.490097 | 1.262032  | 1.331861  |
| H  | -3.326096 | 0.611542  | -0.382002 |

E = -539.043369530

G = -538.851894

$H_2$

E = -1.17751649843

G = -1.178858

**Cp<sub>2</sub>SmH + propene : vinylic activation**

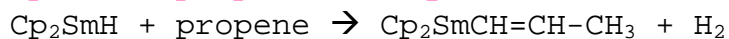

*Adduct of propene on Cp<sub>2</sub>SmH*

|    |           |           |           |
|----|-----------|-----------|-----------|
| C  | 2.780107  | -0.088350 | -5.772654 |
| C  | 2.721402  | -1.013512 | -4.697208 |
| C  | 1.565159  | -1.811590 | -4.870668 |
| C  | 0.913240  | -1.383250 | -6.056816 |
| C  | 1.660687  | -0.312663 | -6.609369 |
| Sm | 3.198372  | -2.575917 | -6.933566 |
| C  | 4.065284  | -5.064400 | -7.816892 |
| C  | 3.779895  | -5.240593 | -6.436800 |
| C  | 2.382335  | -5.107189 | -6.260388 |
| C  | 1.805173  | -4.843005 | -7.530670 |
| C  | 2.845356  | -4.824364 | -8.493122 |
| C  | 5.848552  | -1.265918 | -6.931949 |
| C  | 6.381123  | -2.439945 | -7.311295 |
| C  | 7.268771  | -3.300872 | -6.469343 |
| H  | 3.209514  | -1.772763 | -8.853815 |
| H  | 3.409758  | -1.066603 | -3.860476 |
| H  | 1.218782  | -2.586194 | -4.196973 |
| H  | -0.018893 | -1.775361 | -6.447072 |
| H  | 1.416649  | 0.238507  | -7.507809 |
| H  | 3.523860  | 0.688567  | -5.905647 |
| H  | 4.495921  | -5.487757 | -5.660257 |
| H  | 1.843700  | -5.223315 | -5.327665 |
| H  | 0.747835  | -4.721052 | -7.735704 |
| H  | 2.727915  | -4.660227 | -9.555995 |
| H  | 5.038823  | -5.154848 | -8.284309 |
| H  | 5.284068  | -0.658457 | -7.640180 |
| H  | 6.026488  | -0.850793 | -5.941764 |
| H  | 6.201998  | -2.774563 | -8.334531 |
| H  | 8.272404  | -3.339797 | -6.910481 |
| H  | 7.360841  | -2.918675 | -5.448874 |
| H  | 6.906853  | -4.333492 | -6.428368 |

E = -540.217401484

G = -540.011948

*Transition state*

|    |           |           |           |
|----|-----------|-----------|-----------|
| C  | 2.759952  | -0.185230 | -5.604109 |
| C  | 2.387488  | -1.126078 | -4.612072 |
| C  | 1.210213  | -1.784884 | -5.049978 |
| C  | 0.857191  | -1.250963 | -6.316457 |
| C  | 1.813923  | -0.260985 | -6.656972 |
| Sm | 3.155753  | -2.658811 | -6.763958 |
| C  | 3.694608  | -4.938828 | -8.237583 |
| C  | 3.757027  | -5.355254 | -6.887859 |
| C  | 2.449108  | -5.274865 | -6.340851 |
| C  | 1.576530  | -4.821312 | -7.363662 |
| C  | 2.346565  | -4.604836 | -8.532985 |
| C  | 5.597189  | -1.931084 | -6.771385 |
| C  | 6.599021  | -2.826192 | -6.880573 |
| C  | 7.961872  | -2.725886 | -6.259074 |
| H  | 3.948145  | -1.643949 | -8.590450 |
| H  | 2.891585  | -1.286100 | -3.665137 |
| H  | 0.654055  | -2.533120 | -4.497219 |
| H  | -0.015201 | -1.521761 | -6.899941 |
| H  | 1.807567  | 0.351241  | -7.550766 |
| H  | 3.603151  | 0.492727  | -5.555381 |
| H  | 4.643340  | -5.700293 | -6.368035 |
| H  | 2.156721  | -5.570252 | -5.339456 |
| H  | 0.504944  | -4.688364 | -7.272364 |
| H  | 1.968492  | -4.284106 | -9.496819 |
| H  | 4.522470  | -4.903145 | -8.935626 |
| H  | 4.683528  | -1.700547 | -7.996198 |
| H  | 5.838007  | -1.026534 | -6.196804 |
| H  | 6.447791  | -3.721875 | -7.491422 |
| H  | 8.742731  | -2.722335 | -7.031285 |
| H  | 8.065096  | -1.815828 | -5.660972 |
| H  | 8.170016  | -3.589601 | -5.614612 |

E = -540.186750970

G = -539.983866

*Adduct of H<sub>2</sub> on Cp<sub>2</sub>SmCH=CH-CH<sub>3</sub>*

|    |           |           |           |
|----|-----------|-----------|-----------|
| C  | 2.677771  | -0.109192 | -5.779108 |
| C  | 2.531219  | -0.946015 | -4.649525 |
| C  | 1.372036  | -1.744764 | -4.839300 |
| C  | 0.796174  | -1.389119 | -6.085438 |
| C  | 1.606021  | -0.384279 | -6.670193 |
| Sm | 3.157121  | -2.669194 | -6.703486 |
| C  | 3.773920  | -4.892919 | -8.228105 |
| C  | 3.672047  | -5.369548 | -6.901964 |
| C  | 2.311710  | -5.272447 | -6.502012 |
| C  | 1.571974  | -4.751199 | -7.593367 |
| C  | 2.474948  | -4.504072 | -8.655846 |
| C  | 5.540676  | -2.190094 | -6.344784 |
| C  | 6.589517  | -3.011657 | -6.577105 |
| C  | 8.036990  | -2.740344 | -6.270535 |
| H  | 3.836620  | -1.413342 | -8.970712 |
| H  | 3.182050  | -0.961139 | -3.782960 |
| H  | 0.964268  | -2.457169 | -4.130986 |
| H  | -0.118049 | -1.794446 | -6.502709 |
| H  | 1.408805  | 0.127525  | -7.605923 |
| H  | 3.458910  | 0.626581  | -5.927091 |
| H  | 4.486881  | -5.755171 | -6.300835 |
| H  | 1.900613  | -5.601786 | -5.554297 |
| H  | 0.500816  | -4.588916 | -7.616180 |
| H  | 2.211629  | -4.144233 | -9.644602 |
| H  | 4.678601  | -4.855938 | -8.823169 |
| H  | 4.470349  | -1.485442 | -8.562321 |
| H  | 5.857374  | -1.238349 | -5.885200 |
| H  | 6.417221  | -3.992265 | -7.035300 |
| H  | 8.652849  | -2.788075 | -7.179130 |
| H  | 8.170228  | -1.753054 | -5.817155 |
| H  | 8.447256  | -3.492542 | -5.583094 |

E = -540.193543471

G = -539.992504

*Cp<sub>2</sub>SmCH=CH-CH<sub>3</sub> (vinylic complex)*

|    |           |           |           |
|----|-----------|-----------|-----------|
| C  | 2.115312  | 0.775220  | 1.590100  |
| C  | 2.049102  | -0.639969 | 1.560367  |
| C  | 0.911468  | -1.039857 | 2.311331  |
| C  | 0.274786  | 0.125080  | 2.801370  |
| C  | 1.014757  | 1.248329  | 2.349774  |
| Sm | -0.108713 | 0.194546  | 0.070413  |
| C  | 0.635228  | 1.708243  | -2.107311 |
| C  | 1.476338  | 0.569990  | -2.166649 |
| C  | 0.669358  | -0.555990 | -2.463657 |
| C  | -0.671877 | -0.108510 | -2.613089 |
| C  | -0.692552 | 1.287418  | -2.392866 |
| C  | -2.469877 | -0.136989 | 0.628704  |
| C  | -3.523953 | -0.001874 | -0.208091 |
| C  | -4.978533 | -0.176640 | 0.133577  |
| H  | 0.805308  | 2.285438  | 2.589249  |
| H  | 2.887589  | 1.386008  | 1.137329  |
| H  | 2.769726  | -1.300417 | 1.091267  |
| H  | 0.603320  | -2.061034 | 2.507487  |
| H  | -0.611930 | 0.152754  | 3.421937  |
| H  | -1.564889 | 1.927458  | -2.456071 |
| H  | 0.958157  | 2.729905  | -1.939501 |
| H  | 2.550516  | 0.563922  | -2.024174 |
| H  | 1.023196  | -1.569945 | -2.616617 |
| H  | -1.525160 | -0.724830 | -2.869216 |
| H  | -2.790648 | -0.405022 | 1.649426  |
| H  | -3.352723 | 0.263628  | -1.257793 |
| H  | -5.440788 | -0.962438 | -0.479424 |
| H  | -5.110976 | -0.441484 | 1.187340  |
| H  | -5.548789 | 0.741247  | -0.064312 |

E = -539.013283696

G = -538.826746



**Cp<sub>2</sub>SmH + SiH<sub>4</sub> : Si-H activation (Si at  $\alpha$  position at the TS)**

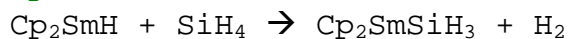

Adduct of SiH<sub>4</sub> on Cp<sub>2</sub>SmH

|    |           |           |           |
|----|-----------|-----------|-----------|
| Sm | 0.181588  | -0.565831 | -0.005027 |
| Si | -3.008382 | -1.568852 | 0.030746  |
| H  | -1.760280 | -2.415482 | 0.045656  |
| H  | 0.692799  | -2.572838 | 0.062546  |
| H  | -3.792687 | -1.769552 | 1.277240  |
| H  | -2.524470 | -0.139484 | -0.012833 |
| H  | -3.811906 | -1.838727 | -1.190153 |
| C  | 1.850971  | 0.221109  | 1.993416  |
| C  | 0.962974  | 1.317245  | 1.823816  |
| C  | -0.316766 | 0.914236  | 2.273492  |
| C  | -0.220227 | -0.430681 | 2.721187  |
| C  | 1.121322  | -0.855463 | 2.557470  |
| C  | 1.851211  | 0.028906  | -2.069767 |
| C  | 1.068546  | -1.048023 | -2.556458 |
| C  | -0.257035 | -0.577633 | -2.726902 |
| C  | -0.290610 | 0.794651  | -2.360024 |
| C  | 1.012253  | 1.169565  | -1.954534 |
| H  | 2.912735  | 0.223456  | 1.774349  |
| H  | 1.227478  | 2.300510  | 1.453076  |
| H  | -1.202240 | 1.539095  | 2.313966  |
| H  | -1.018685 | -1.014236 | 3.166053  |
| H  | 1.517930  | -1.827459 | 2.818508  |
| H  | 2.915323  | -0.001076 | -1.864693 |
| H  | 1.421228  | -2.049472 | -2.763486 |
| H  | -1.085998 | -1.151826 | -3.125974 |
| H  | -1.150155 | 1.452653  | -2.425977 |
| H  | 1.323612  | 2.161499  | -1.649228 |

E = -428.626541161

G = -428.468914

*Transition state*

|    |           |           |           |
|----|-----------|-----------|-----------|
| Sm | 0.034745  | -0.381276 | -0.012811 |
| Si | -2.687303 | -1.678965 | 0.038226  |
| H  | -1.064542 | -2.336147 | 0.054511  |
| H  | 0.143360  | -2.496470 | 0.056799  |
| H  | -3.458539 | -2.025983 | 1.270464  |
| H  | -2.654819 | -0.145989 | -0.010212 |
| H  | -3.466840 | -2.103297 | -1.164259 |
| C  | 1.802079  | 0.098877  | 1.999532  |
| C  | 1.050432  | 1.300195  | 1.883486  |
| C  | -0.268967 | 1.032518  | 2.321295  |
| C  | -0.336229 | -0.332873 | 2.705915  |
| C  | 0.947462  | -0.906505 | 2.515517  |
| C  | 1.794980  | -0.022884 | -2.056499 |
| C  | 0.943033  | -1.062367 | -2.505169 |
| C  | -0.343388 | -0.506763 | -2.728150 |
| C  | -0.280568 | 0.880559  | -2.431385 |
| C  | 1.038905  | 1.180474  | -2.015163 |
| H  | 2.857226  | -0.014364 | 1.778132  |
| H  | 1.432494  | 2.261430  | 1.559982  |
| H  | -1.076170 | 1.753488  | 2.388122  |
| H  | -1.199485 | -0.833291 | 3.128960  |
| H  | 1.227961  | -1.927093 | 2.742160  |
| H  | 2.851272  | -0.117722 | -1.831849 |
| H  | 1.227012  | -2.094237 | -2.667236 |
| H  | -1.205888 | -1.036577 | -3.115477 |
| H  | -1.090533 | 1.592984  | -2.542235 |
| H  | 1.417832  | 2.161885  | -1.754527 |

E = -428.618648141

G = -428.459709

*Adduct of H<sub>2</sub> on Cp<sub>2</sub>SmSiH<sub>3</sub>*

|    |           |           |           |
|----|-----------|-----------|-----------|
| Sm | -0.098530 | -0.404265 | -0.008775 |
| Si | -2.877277 | -1.162073 | 0.020544  |
| H  | -0.438089 | -2.862393 | 0.065247  |
| H  | 0.326000  | -2.905323 | 0.068269  |
| H  | -3.818876 | -1.077512 | 1.198925  |
| H  | -2.387080 | 0.351772  | -0.023577 |
| H  | -3.820078 | -1.146035 | -1.159785 |
| C  | 1.783132  | 0.196803  | 1.868419  |
| C  | 0.858053  | 1.273787  | 1.909265  |
| C  | -0.359986 | 0.783433  | 2.444922  |
| C  | -0.195097 | -0.596283 | 2.726036  |
| C  | 1.132615  | -0.956958 | 2.373148  |
| C  | 1.767736  | 0.048364  | -1.942037 |
| C  | 1.088432  | -1.119680 | -2.370141 |
| C  | -0.236897 | -0.754273 | -2.726505 |
| C  | -0.371965 | 0.642446  | -2.523897 |
| C  | 0.862251  | 1.138985  | -2.033001 |
| H  | 2.817262  | 0.258670  | 1.550049  |
| H  | 1.064798  | 2.300309  | 1.629213  |
| H  | -1.256096 | 1.364381  | 2.627740  |
| H  | -0.937136 | -1.246748 | 3.172181  |
| H  | 1.584689  | -1.932481 | 2.512590  |
| H  | 2.807207  | 0.108313  | -1.641278 |
| H  | 1.520028  | -2.110318 | -2.458411 |
| H  | -0.997295 | -1.414905 | -3.124135 |
| H  | -1.259451 | 1.229122  | -2.729162 |
| H  | 1.092181  | 2.175801  | -1.816045 |

E = -428.634732542

G = -428.474322

$Cp_2SmSiH_3$  (*silyl complex*)

|    |           |           |           |
|----|-----------|-----------|-----------|
| Sm | 0.012178  | 0.013956  | -0.055232 |
| C  | 2.717161  | 0.446808  | 0.083382  |
| C  | 2.575666  | -0.905991 | -0.310994 |
| C  | 2.025039  | -0.921480 | -1.619741 |
| C  | 1.838723  | 0.421996  | -2.036394 |
| C  | 2.262398  | 1.268920  | -0.981395 |
| C  | -2.671303 | 0.522888  | 0.242215  |
| C  | -2.216176 | 1.470050  | -0.712783 |
| C  | -1.857685 | 0.766744  | -1.890007 |
| C  | -2.084640 | -0.615234 | -1.659263 |
| C  | -2.596116 | -0.763898 | -0.343066 |
| H  | 3.134369  | 0.790319  | 1.023565  |
| H  | 2.858054  | -1.771854 | 0.274441  |
| H  | 1.829896  | -1.805269 | -2.216811 |
| H  | 1.473499  | 0.744348  | -3.004086 |
| H  | 2.285375  | 2.353091  | -1.007688 |
| H  | -3.042962 | 0.743361  | 1.236439  |
| H  | -2.197243 | 2.547282  | -0.585750 |
| H  | -1.509858 | 1.209521  | -2.815597 |
| H  | -1.947184 | -1.411062 | -2.382679 |
| H  | -2.895282 | -1.692513 | 0.126324  |
| Si | -0.002566 | -2.047720 | 2.140529  |
| H  | -1.177208 | -2.074483 | 3.096339  |
| H  | -0.001463 | -3.463900 | 1.596108  |
| H  | 1.187329  | -2.068744 | 3.078551  |

E = -427.451102323

G = -427.307459

**Cp<sub>2</sub>SmH + SiH<sub>4</sub> : Si-H activation (Si at β position at the TS)**

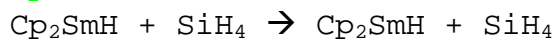

*Adduct of SiH<sub>4</sub> on Cp<sub>2</sub>SmH*

|    |           |           |           |
|----|-----------|-----------|-----------|
| Sm | -0.043384 | 0.058836  | -0.161916 |
| C  | 2.700898  | 0.133879  | -0.105135 |
| C  | 2.368251  | -1.239648 | -0.215097 |
| C  | 1.791956  | -1.448483 | -1.494105 |
| C  | 1.778051  | -0.204812 | -2.179374 |
| C  | 2.336912  | 0.773339  | -1.319382 |
| C  | -2.736381 | -0.426100 | -0.038722 |
| C  | -2.620451 | 0.985697  | 0.015956  |
| C  | -2.149539 | 1.437587  | -1.245064 |
| C  | -1.974984 | 0.304938  | -2.079082 |
| C  | -2.331451 | -0.847802 | -1.330835 |
| H  | 3.187883  | 0.603362  | 0.741533  |
| H  | 2.542606  | -1.997448 | 0.538389  |
| H  | 1.465794  | -2.400403 | -1.898009 |
| H  | 1.437756  | -0.040813 | -3.195031 |
| H  | 2.502730  | 1.816668  | -1.565430 |
| H  | -3.089991 | -1.065825 | 0.760068  |
| H  | -2.887513 | 1.612432  | 0.858811  |
| H  | -1.998856 | 2.471337  | -1.536920 |
| H  | -1.662902 | 0.319925  | -3.116725 |
| H  | -2.339754 | -1.867482 | -1.699347 |
| H  | 1.208157  | -0.773948 | 3.406303  |
| H  | 0.179701  | 1.097243  | 1.842879  |
| Si | 0.051194  | 0.109599  | 3.069809  |
| H  | -0.168957 | -1.076814 | 1.612880  |
| H  | 0.258765  | 1.276104  | 4.033784  |
| H  | -1.308521 | -0.371069 | 3.460419  |

E = -428.631607096

G = -428.470339

*Transition state*

|    |           |           |           |
|----|-----------|-----------|-----------|
| Sm | -0.050149 | 0.023780  | -0.158877 |
| C  | 2.690609  | 0.110732  | -0.104366 |
| C  | 2.365338  | -1.266357 | -0.193515 |
| C  | 1.795720  | -1.500502 | -1.472018 |
| C  | 1.774572  | -0.268200 | -2.175596 |
| C  | 2.324539  | 0.727478  | -1.328565 |
| C  | -2.760797 | -0.373554 | -0.054916 |
| C  | -2.597163 | 1.032754  | 0.023644  |
| C  | -2.100796 | 1.486457  | -1.225723 |
| C  | -1.959696 | 0.361486  | -2.077546 |
| C  | -2.362104 | -0.789879 | -1.351191 |
| H  | 3.163811  | 0.597985  | 0.739438  |
| H  | 2.550389  | -2.012570 | 0.569698  |
| H  | 1.479941  | -2.461307 | -1.863285 |
| H  | 1.435556  | -0.122177 | -3.194441 |
| H  | 2.480956  | 1.768751  | -1.588718 |
| H  | -3.151619 | -1.012069 | 0.728155  |
| H  | -2.843581 | 1.655283  | 0.875314  |
| H  | -1.908237 | 2.518477  | -1.497967 |
| H  | -1.641488 | 0.382293  | -3.113199 |
| H  | -2.407370 | -1.801733 | -1.738311 |
| H  | 1.475149  | -0.196557 | 3.245487  |
| H  | 0.112526  | 1.109821  | 1.712519  |
| Si | 0.016412  | 0.045497  | 3.026368  |
| H  | -0.252671 | -1.008950 | 1.734026  |
| H  | -0.372033 | 1.284420  | 3.811604  |
| H  | -0.748166 | -0.986061 | 3.835946  |

E = -428.628963675

G = -428.468002

**Cp<sub>2</sub>SmCH<sub>2</sub>CH<sub>2</sub>CH<sub>3</sub> (propyl complex)**

|    |           |           |           |
|----|-----------|-----------|-----------|
| C  | 2.280756  | 3.420334  | -1.116375 |
| C  | 3.199026  | 3.738073  | -0.082524 |
| C  | 2.524034  | 4.536137  | 0.876929  |
| C  | 1.186082  | 4.698738  | 0.442401  |
| C  | 1.034349  | 4.008083  | -0.789481 |
| Sm | 1.402965  | 2.020697  | 1.093000  |
| C  | 0.908540  | -0.613524 | 1.768246  |
| C  | 2.085613  | -0.647353 | 0.982422  |
| C  | 1.739164  | -0.298224 | -0.348705 |
| C  | 0.344250  | -0.046637 | -0.384721 |
| C  | -0.168546 | -0.239881 | 0.923807  |
| H  | -0.365473 | 2.721623  | 2.561235  |
| C  | 0.119826  | 2.599202  | 3.591580  |
| C  | 1.617189  | 2.352129  | 3.507504  |
| C  | -0.321354 | 3.847509  | 4.358101  |
| H  | 2.961492  | 4.967240  | 1.768372  |
| H  | 0.423190  | 5.287203  | 0.939706  |
| H  | 0.137943  | 3.979034  | -1.399047 |
| H  | 2.500734  | 2.851962  | -2.012483 |
| H  | 4.248976  | 3.466679  | -0.059161 |
| H  | 2.412257  | -0.271996 | -1.197848 |
| H  | -0.233184 | 0.207245  | -1.266446 |
| H  | -1.210180 | -0.166158 | 1.216543  |
| H  | 0.840264  | -0.855222 | 2.821414  |
| H  | 3.073902  | -0.926352 | 1.331167  |
| H  | 0.167237  | 4.741385  | 3.955814  |
| H  | -0.030793 | 3.759360  | 5.409660  |
| H  | -1.405682 | 4.003938  | 4.313502  |
| H  | -0.402745 | 1.716884  | 3.980892  |
| H  | 2.183924  | 3.243654  | 3.798295  |
| H  | 1.928973  | 1.515677  | 4.138318  |

E = -540.244424824

G = -540.032604

**Cp<sub>2</sub>SmCH<sub>2</sub>CH<sub>2</sub>CH<sub>3</sub> + propene : 1,2 insertion**

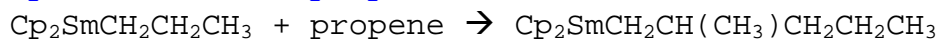

Adduct of propene on Cp<sub>2</sub>SmCH<sub>2</sub>CH<sub>2</sub>CH<sub>3</sub>

|    |           |          |           |
|----|-----------|----------|-----------|
| C  | 1.371471  | 2.561586 | 1.067047  |
| C  | 1.526460  | 3.891530 | 0.594103  |
| C  | 0.971871  | 3.966422 | -0.702781 |
| C  | 0.468718  | 2.680680 | -1.037271 |
| C  | 0.725240  | 1.812667 | 0.053811  |
| Sm | -1.223402 | 3.553087 | 0.942457  |
| C  | -3.176308 | 2.765300 | 2.793394  |
| C  | -2.458605 | 1.583752 | 2.480141  |
| C  | -2.737670 | 1.250461 | 1.131094  |
| C  | -3.626161 | 2.226654 | 0.614065  |
| C  | -3.896615 | 3.165524 | 1.641503  |
| C  | -0.252464 | 4.622851 | 3.559157  |
| C  | -1.000100 | 5.705752 | 3.280103  |
| C  | -0.459335 | 7.059415 | 2.951155  |
| C  | -1.974154 | 5.750388 | 0.098834  |
| C  | -2.358606 | 5.109906 | -1.228071 |
| C  | -3.785465 | 5.382036 | -1.706674 |
| H  | -1.642909 | 5.378666 | -2.014734 |
| H  | 0.957129  | 4.842934 | -1.338441 |
| H  | 0.019393  | 2.398564 | -1.982621 |
| H  | 0.489545  | 0.756056 | 0.096029  |
| H  | 1.730068  | 2.173008 | 2.013652  |
| H  | 2.013904  | 4.703581 | 1.120858  |
| H  | -2.367856 | 0.381622 | 0.599771  |
| H  | -4.058286 | 2.229199 | -0.379826 |
| H  | -4.568813 | 4.011607 | 1.571951  |
| H  | -3.213280 | 3.248634 | 3.763522  |
| H  | -1.840623 | 1.009556 | 3.161432  |
| H  | 0.622915  | 7.036989 | 2.797090  |
| H  | -0.672635 | 7.751717 | 3.775701  |
| H  | -0.935991 | 7.467761 | 2.055996  |
| H  | -2.085082 | 5.626296 | 3.359227  |
| H  | 0.833148  | 4.662837 | 3.533417  |
| H  | -0.704622 | 3.696699 | 3.909050  |
| H  | -1.219818 | 6.531379 | -0.035407 |
| H  | -2.847528 | 6.189258 | 0.595750  |
| H  | -2.270777 | 3.977397 | -1.211038 |
| H  | -4.027830 | 4.838814 | -2.627863 |
| H  | -3.920521 | 6.452016 | -1.895375 |
| H  | -4.512753 | 5.088931 | -0.941705 |

E = -658.123070975

G = -657.835325



*Transition state*

|    |           |          |           |
|----|-----------|----------|-----------|
| C  | 1.219201  | 2.205316 | 0.889145  |
| C  | 1.534007  | 3.585130 | 0.817134  |
| C  | 1.012640  | 4.092529 | -0.395873 |
| C  | 0.383738  | 3.020636 | -1.083407 |
| C  | 0.517909  | 1.855225 | -0.292757 |
| Sm | -1.243607 | 3.443067 | 1.121422  |
| C  | -3.600481 | 2.714230 | 2.432241  |
| C  | -2.617222 | 1.798232 | 2.880435  |
| C  | -2.255579 | 0.974124 | 1.786001  |
| C  | -3.013081 | 1.382982 | 0.659272  |
| C  | -3.847092 | 2.456872 | 1.062589  |
| C  | -0.665279 | 4.752603 | 3.188666  |
| C  | -1.128321 | 5.931582 | 2.541682  |
| C  | -0.100152 | 6.941833 | 2.084396  |
| C  | -2.383283 | 5.800448 | 0.818857  |
| C  | -2.312199 | 5.462196 | -0.675157 |
| C  | -3.579985 | 5.865201 | -1.438148 |
| H  | -1.439797 | 5.950454 | -1.124933 |
| H  | 1.118882  | 5.107772 | -0.759907 |
| H  | -0.073577 | 3.072873 | -2.065088 |
| H  | 0.164192  | 0.865144 | -0.553781 |
| H  | 1.508310  | 1.526323 | 1.683195  |
| H  | 2.103539  | 4.144032 | 1.549270  |
| H  | -1.548522 | 0.153608 | 1.813644  |
| H  | -2.992493 | 0.925334 | -0.323062 |
| H  | -4.573885 | 2.965156 | 0.438964  |
| H  | -4.096138 | 3.462080 | 3.040223  |
| H  | -2.234082 | 1.718701 | 3.890807  |
| H  | 0.720865  | 6.457006 | 1.548732  |
| H  | 0.331850  | 7.431011 | 2.966379  |
| H  | -0.516737 | 7.720045 | 1.438591  |
| H  | -2.027573 | 6.376792 | 2.964232  |
| H  | 0.410038  | 4.628612 | 3.300892  |
| H  | -1.265367 | 4.353613 | 4.003213  |
| H  | -2.406795 | 6.886234 | 0.898394  |
| H  | -3.328190 | 5.429931 | 1.241714  |
| H  | -2.174778 | 4.379454 | -0.903405 |
| H  | -3.506603 | 5.615210 | -2.502735 |
| H  | -3.749770 | 6.943427 | -1.354592 |
| H  | -4.460562 | 5.358294 | -1.030163 |

E = -658.104820837

G = -657.812322

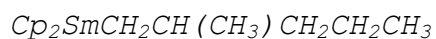

|    |           |           |           |
|----|-----------|-----------|-----------|
| C  | 1.452436  | 2.279958  | 0.918943  |
| C  | 1.508869  | 3.668066  | 0.628766  |
| C  | 0.928695  | 3.867293  | -0.646532 |
| C  | 0.521818  | 2.602924  | -1.150736 |
| C  | 0.854160  | 1.622343  | -0.186663 |
| Sm | -1.168398 | 3.079330  | 1.001304  |
| C  | -3.686194 | 2.338871  | 1.930931  |
| C  | -2.762610 | 1.598751  | 2.702143  |
| C  | -2.130402 | 0.656301  | 1.847955  |
| C  | -2.675496 | 0.810602  | 0.547989  |
| C  | -3.630354 | 1.855431  | 0.596327  |
| C  | -1.223849 | 4.892861  | 2.709326  |
| C  | -1.304267 | 6.378036  | 2.310579  |
| C  | 0.003825  | 6.889073  | 1.698313  |
| C  | -2.498322 | 6.666973  | 1.379446  |
| C  | -2.601358 | 5.757211  | 0.148234  |
| C  | -3.504492 | 6.308099  | -0.955546 |
| H  | -1.595353 | 5.587606  | -0.273208 |
| H  | 0.858398  | 4.813146  | -1.172014 |
| H  | 0.082106  | 2.415145  | -2.124211 |
| H  | 0.695076  | 0.555031  | -0.282582 |
| H  | 1.851426  | 1.798658  | 1.805234  |
| H  | 1.935307  | 4.434554  | 1.262383  |
| H  | -1.402413 | -0.088919 | 2.147535  |
| H  | -2.423335 | 0.216537  | -0.322515 |
| H  | -4.253606 | 2.186127  | -0.227673 |
| H  | -4.338615 | 3.120561  | 2.300950  |
| H  | -2.583178 | 1.718487  | 3.764248  |
| H  | 0.246889  | 6.379186  | 0.758913  |
| H  | 0.841612  | 6.715509  | 2.382570  |
| H  | -0.040244 | 7.965670  | 1.493138  |
| H  | -1.478261 | 7.000789  | 3.205941  |
| H  | -0.366147 | 4.763310  | 3.393606  |
| H  | -2.108738 | 4.658745  | 3.327046  |
| H  | -2.447949 | 7.711208  | 1.039031  |
| H  | -3.434792 | 6.578733  | 1.946538  |
| H  | -3.031200 | 4.788236  | 0.463581  |
| H  | -3.592475 | 5.615746  | -1.799448 |
| H  | -3.112239 | 7.255579  | -1.339375 |
| H  | -4.512903 | 6.498434  | -0.572873 |

E = -658.145767110

G = -657.852717

**Cp<sub>2</sub>SmCH<sub>2</sub>CH<sub>2</sub>CH<sub>3</sub> + propene : 2,1 insertion**

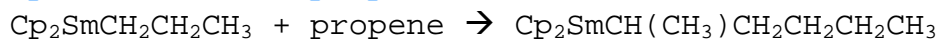

Adduct of propene on Cp<sub>2</sub>SmCH<sub>2</sub>CH<sub>2</sub>CH<sub>3</sub>

|    |           |           |           |
|----|-----------|-----------|-----------|
| C  | -3.658120 | 2.166899  | 0.617784  |
| C  | -3.235324 | 2.823852  | -0.564763 |
| C  | -3.317841 | 4.220563  | -0.343272 |
| C  | -3.801673 | 4.424167  | 0.975078  |
| C  | -4.011336 | 3.158383  | 1.570268  |
| Sm | -1.250355 | 3.318450  | 1.289858  |
| C  | 0.758571  | 1.621828  | 0.458445  |
| C  | 1.413034  | 2.525183  | 1.336136  |
| C  | 1.437423  | 3.794180  | 0.712486  |
| C  | 0.801096  | 3.680714  | -0.550166 |
| C  | 0.385100  | 2.335464  | -0.708099 |
| C  | 0.308822  | 7.242697  | 0.994339  |
| C  | -0.932831 | 6.600414  | 1.528064  |
| C  | -1.045936 | 5.997771  | 2.722738  |
| C  | -1.203737 | 2.871440  | 3.715974  |
| C  | -1.483723 | 1.397442  | 3.458924  |
| C  | -0.550921 | 0.405284  | 4.156255  |
| H  | -2.527343 | 1.154244  | 3.693854  |
| H  | -4.401995 | 2.978416  | 2.563958  |
| H  | -3.742909 | 1.094836  | 0.753399  |
| H  | -2.931670 | 2.342591  | -1.486557 |
| H  | -3.101466 | 4.992566  | -1.073323 |
| H  | -4.021351 | 5.382566  | 1.432311  |
| H  | -0.101822 | 1.917789  | -1.581072 |
| H  | 0.616677  | 0.560544  | 0.627074  |
| H  | 1.845904  | 2.280995  | 2.297983  |
| H  | 1.897575  | 4.688137  | 1.116177  |
| H  | 0.695741  | 4.466989  | -1.289305 |
| H  | -0.199618 | 5.903380  | 3.398449  |
| H  | -1.825132 | 6.695309  | 0.907638  |
| H  | -1.958977 | 3.319726  | 4.368389  |
| H  | -0.220088 | 3.012709  | 4.180272  |
| H  | -1.421176 | 1.125590  | 2.357379  |
| H  | -0.764620 | -0.634348 | 3.880087  |
| H  | -0.649915 | 0.497933  | 5.242684  |
| H  | 0.494548  | 0.612100  | 3.903228  |
| H  | 0.145217  | 8.320858  | 0.873479  |
| H  | 1.160196  | 7.101565  | 1.665245  |
| H  | 0.575151  | 6.854635  | 0.005363  |
| H  | -2.000195 | 5.630005  | 3.090036  |

E = -658.121572658

G = -657.834534

*Transition state*

|    |           |          |           |
|----|-----------|----------|-----------|
| C  | -3.517955 | 2.000459 | 0.586873  |
| C  | -3.152158 | 2.536246 | -0.671323 |
| C  | -3.354282 | 3.938943 | -0.627014 |
| C  | -3.865741 | 4.265248 | 0.654039  |
| C  | -3.962172 | 3.072325 | 1.405884  |
| Sm | -1.216123 | 3.454217 | 1.059694  |
| C  | 0.422308  | 1.690298 | -0.287690 |
| C  | 1.161264  | 2.009593 | 0.880008  |
| C  | 1.560951  | 3.364158 | 0.789971  |
| C  | 1.074138  | 3.884492 | -0.434987 |
| C  | 0.373626  | 2.849201 | -1.102431 |
| C  | 0.169601  | 6.710815 | 1.421286  |
| C  | -1.088235 | 5.917343 | 1.718531  |
| C  | -1.312441 | 5.440219 | 3.037133  |
| C  | -0.804336 | 3.494086 | 3.671248  |
| C  | -1.358808 | 2.066053 | 3.590618  |
| C  | -0.591509 | 1.083347 | 4.483258  |
| H  | -2.418695 | 2.068051 | 3.868133  |
| H  | -4.353706 | 2.986240 | 2.412726  |
| H  | -3.511636 | 0.950300 | 0.856251  |
| H  | -2.798150 | 1.970262 | -1.524391 |
| H  | -3.193192 | 4.631909 | -1.445047 |
| H  | -4.160154 | 5.252528 | 0.988961  |
| H  | -0.089972 | 2.921447 | -2.079199 |
| H  | 0.008816  | 0.719400 | -0.535133 |
| H  | 1.410945  | 1.322870 | 1.680806  |
| H  | 2.164592  | 3.899742 | 1.512923  |
| H  | 1.243476  | 4.885299 | -0.812294 |
| H  | -0.604421 | 5.746191 | 3.804901  |
| H  | -1.982344 | 6.248933 | 1.189420  |
| H  | -1.049986 | 3.869840 | 4.663616  |
| H  | 0.291102  | 3.481884 | 3.588964  |
| H  | -1.337657 | 1.601758 | 2.576678  |
| H  | -1.008206 | 0.071653 | 4.419966  |
| H  | -0.635258 | 1.403252 | 5.529158  |
| H  | 0.463684  | 1.034972 | 4.195329  |
| H  | 0.135061  | 7.719280 | 1.862364  |
| H  | 1.066001  | 6.221150 | 1.818564  |
| H  | 0.329177  | 6.841668 | 0.346182  |
| H  | -2.336240 | 5.389954 | 3.402482  |

E = -658.100107248

G = -657.807427

$Cp_2SmCH(CH_3)CH_2CH_2CH_2CH_3$

|    |           |          |           |
|----|-----------|----------|-----------|
| C  | -3.671911 | 1.899661 | 0.367767  |
| C  | -3.385890 | 2.446214 | -0.905463 |
| C  | -3.490866 | 3.857971 | -0.809922 |
| C  | -3.864687 | 4.182505 | 0.520425  |
| C  | -3.970308 | 2.974612 | 1.248148  |
| Sm | -1.262321 | 3.252265 | 0.666619  |
| C  | 0.315411  | 1.555952 | -0.825696 |
| C  | 1.088697  | 1.819388 | 0.333064  |
| C  | 1.489108  | 3.180320 | 0.295367  |
| C  | 0.959809  | 3.757214 | -0.882485 |
| C  | 0.232593  | 2.755265 | -1.576815 |
| C  | 0.444399  | 5.969121 | 2.168412  |
| C  | -0.945520 | 5.349336 | 1.998250  |
| C  | -1.642571 | 5.194078 | 3.363538  |
| C  | -0.993830 | 4.185467 | 4.323788  |
| C  | -0.805089 | 2.787917 | 3.727312  |
| C  | -0.370325 | 1.726338 | 4.736809  |
| H  | -1.760280 | 2.462146 | 3.272087  |
| H  | -4.276271 | 2.882551 | 2.284133  |
| H  | -3.709707 | 0.843691 | 0.612651  |
| H  | -3.144078 | 1.884751 | -1.799943 |
| H  | -3.367548 | 4.561546 | -1.625942 |
| H  | -4.051291 | 5.177060 | 0.905693  |
| H  | -0.260365 | 2.872593 | -2.534763 |
| H  | -0.108491 | 0.598761 | -1.106997 |
| H  | 1.374583  | 1.092252 | 1.085556  |
| H  | 2.109443  | 3.686313 | 1.024230  |
| H  | 1.109360  | 4.779507 | -1.210463 |
| H  | -1.688833 | 6.161747 | 3.896966  |
| H  | -1.553534 | 6.081014 | 1.433569  |
| H  | -1.606318 | 4.100608 | 5.231793  |
| H  | -0.013386 | 4.552235 | 4.654654  |
| H  | -0.026652 | 2.842542 | 2.944847  |
| H  | -0.221392 | 0.748662 | 4.266995  |
| H  | -1.121536 | 1.608593 | 5.524733  |
| H  | 0.570989  | 2.013769 | 5.216740  |
| H  | 0.429014  | 6.894696 | 2.772338  |
| H  | 1.150679  | 5.292604 | 2.669758  |
| H  | 0.898024  | 6.229101 | 1.204751  |
| H  | -2.692265 | 4.893732 | 3.220321  |

E = -658.142828378

G = -657.849334

**Cp<sub>2</sub>SmCH<sub>2</sub>CH<sub>2</sub>CH<sub>3</sub> + propene : allylic activation**

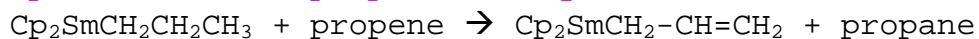

Adduct of propene on Cp<sub>2</sub>SmCH<sub>2</sub>CH<sub>2</sub>CH<sub>3</sub>

|    |           |           |           |
|----|-----------|-----------|-----------|
| C  | 1.374362  | 0.853455  | -1.655441 |
| C  | 1.433118  | -0.542093 | -1.427024 |
| C  | 0.102883  | -1.034286 | -1.392575 |
| C  | -0.776143 | 0.061072  | -1.592772 |
| C  | 0.008623  | 1.225039  | -1.761373 |
| Sm | 0.475991  | -0.355722 | -4.012855 |
| C  | 1.067426  | -1.809308 | -6.327061 |
| C  | -0.020459 | -2.475129 | -5.717520 |
| C  | 0.440837  | -3.042587 | -4.502866 |
| C  | 1.822115  | -2.741293 | -4.372526 |
| C  | 2.208306  | -1.976369 | -5.496605 |
| C  | -1.768459 | 0.236648  | -4.882053 |
| C  | -2.423165 | 1.576668  | -4.528986 |
| H  | -1.744820 | 2.412437  | -4.769813 |
| C  | -3.762524 | 1.839671  | -5.227643 |
| C  | 0.786726  | 2.219129  | -7.011226 |
| C  | 1.862675  | 1.669532  | -6.131244 |
| C  | 2.086878  | 2.034691  | -4.857589 |
| H  | -0.372121 | 2.228622  | -1.910772 |
| H  | 2.222591  | 1.528215  | -1.684804 |
| H  | 2.332508  | -1.125046 | -1.267325 |
| H  | -0.190937 | -2.058614 | -1.195398 |
| H  | -1.857911 | 0.016231  | -1.605561 |
| H  | 1.044254  | -1.308352 | -7.288182 |
| H  | 3.212589  | -1.625354 | -5.708745 |
| H  | 2.471104  | -3.063347 | -3.567022 |
| H  | -0.145117 | -3.647049 | -3.820175 |
| H  | -1.026803 | -2.542725 | -6.110571 |
| H  | -1.698578 | 0.159603  | -5.983825 |
| H  | -2.460127 | -0.578327 | -4.600880 |
| H  | 1.235330  | 2.710593  | -7.883163 |
| H  | 0.160242  | 2.944629  | -6.486969 |
| H  | 0.142493  | 1.420834  | -7.395117 |
| H  | -2.580058 | 1.641691  | -3.443021 |
| H  | -4.198345 | 2.807210  | -4.946315 |
| H  | -3.643141 | 1.830309  | -6.317698 |
| H  | -4.489026 | 1.058578  | -4.974887 |
| H  | 2.532021  | 0.939804  | -6.587036 |
| H  | 2.935924  | 1.646873  | -4.298208 |
| H  | 1.480786  | 2.794149  | -4.367236 |

E = -658.123292402

G = -657.837740

*Transition state*

|    |           |           |           |
|----|-----------|-----------|-----------|
| C  | 1.587586  | 0.669355  | -1.695690 |
| C  | 1.063290  | -0.630737 | -1.504643 |
| C  | -0.343340 | -0.565815 | -1.679511 |
| C  | -0.686257 | 0.777692  | -1.969698 |
| C  | 0.505736  | 1.540526  | -1.988133 |
| Sm | 0.689842  | -0.153492 | -4.186553 |
| C  | 0.944928  | -1.825133 | -6.393598 |
| C  | -0.003878 | -2.449152 | -5.545641 |
| C  | 0.668419  | -2.879593 | -4.377035 |
| C  | 2.037752  | -2.523043 | -4.502433 |
| C  | 2.206752  | -1.880787 | -5.752445 |
| C  | -1.720042 | 0.404452  | -5.202183 |
| C  | -2.640047 | 1.620367  | -5.097778 |
| H  | -2.321624 | 2.391372  | -5.815083 |
| C  | -4.117763 | 1.306927  | -5.344693 |
| C  | 0.552106  | 2.118509  | -5.800315 |
| C  | 1.929684  | 1.647140  | -5.883255 |
| C  | 2.837362  | 1.630900  | -4.865283 |
| H  | 0.572665  | 2.611393  | -2.142627 |
| H  | 2.628620  | 0.953635  | -1.596087 |
| H  | 1.632184  | -1.514252 | -1.240877 |
| H  | -1.037741 | -1.390175 | -1.565495 |
| H  | -1.688132 | 1.157459  | -2.124667 |
| H  | 0.745469  | -1.416754 | -7.377556 |
| H  | 3.144468  | -1.515920 | -6.154890 |
| H  | 2.822506  | -2.745502 | -3.788989 |
| H  | 0.225098  | -3.419488 | -3.548881 |
| H  | -1.055693 | -2.588903 | -5.762904 |
| H  | -1.815759 | -0.055039 | -6.196018 |
| H  | -2.060475 | -0.357849 | -4.481423 |
| H  | 0.134027  | 2.398110  | -6.769472 |
| H  | 0.403287  | 2.922145  | -5.072755 |
| H  | -0.417164 | 1.245691  | -5.479556 |
| H  | -2.534183 | 2.084573  | -4.107448 |
| H  | -4.742626 | 2.205021  | -5.271383 |
| H  | -4.265257 | 0.877427  | -6.342149 |
| H  | -4.492720 | 0.578777  | -4.616344 |
| H  | 2.209083  | 1.138642  | -6.807176 |
| H  | 3.824118  | 1.201397  | -5.003295 |
| H  | 2.668576  | 2.191990  | -3.948825 |

E = -658.106202773

G = -657.819270

*Propane*

|   |           |           |           |
|---|-----------|-----------|-----------|
| C | 0.000007  | 0.088835  | 0.000106  |
| H | 0.019158  | 0.133981  | 1.095157  |
| H | 1.038564  | 0.135147  | -0.347477 |
| C | -0.688300 | -1.183920 | -0.487090 |
| H | -0.722302 | -1.183920 | -1.584375 |
| C | 0.000007  | -2.456675 | 0.000106  |
| H | -1.734365 | -1.183920 | -0.153958 |
| H | -0.510552 | 0.988095  | -0.360075 |
| H | -0.510552 | -3.355935 | -0.360075 |
| H | 1.038564  | -2.502987 | -0.347477 |
| H | 0.019158  | -2.501821 | 1.095157  |

E = -119.110587845

G = -119.032363



**Cp<sub>2</sub>SmCH<sub>2</sub>CH<sub>2</sub>CH<sub>3</sub> + propene : vinylic activation**

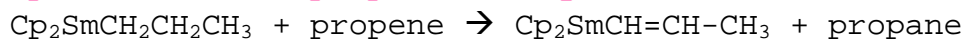

Adduct of propene on Cp<sub>2</sub>SmCH<sub>2</sub>CH<sub>2</sub>CH<sub>3</sub>

|    |           |           |           |
|----|-----------|-----------|-----------|
| C  | 2.736420  | -0.148380 | -6.150098 |
| C  | 2.583386  | -1.057592 | -5.079485 |
| C  | 1.366840  | -1.761879 | -5.275469 |
| C  | 0.779045  | -1.297721 | -6.480025 |
| C  | 1.617088  | -0.293693 | -7.014424 |
| Sm | 0.543710  | 0.772985  | -4.661642 |
| C  | 0.897244  | 2.200082  | -2.289000 |
| C  | 1.573582  | 0.967988  | -2.112578 |
| C  | 0.597602  | -0.060441 | -2.060547 |
| C  | -0.679399 | 0.539566  | -2.203119 |
| C  | -0.494236 | 1.934420  | -2.347687 |
| C  | 0.852271  | 3.519989  | -5.784866 |
| C  | 2.134646  | 3.281684  | -6.105504 |
| C  | 3.319776  | 3.721391  | -5.307106 |
| C  | -1.778098 | 0.544677  | -5.508849 |
| C  | -2.989828 | 1.354284  | -5.033205 |
| H  | -3.929695 | 0.970977  | -5.466236 |
| C  | -2.902234 | 2.842838  | -5.368080 |
| H  | 1.360506  | 3.180154  | -2.318044 |
| H  | 2.642821  | 0.836929  | -1.992753 |
| H  | 0.792601  | -1.113629 | -1.896464 |
| H  | -1.631681 | 0.023812  | -2.190355 |
| H  | -1.282899 | 2.669731  | -2.452220 |
| H  | 3.589581  | 0.500486  | -6.311803 |
| H  | 3.282383  | -1.209017 | -4.265599 |
| H  | 0.982854  | -2.555930 | -4.645465 |
| H  | -0.148641 | -1.649075 | -6.913072 |
| H  | 1.456505  | 0.233302  | -7.948487 |
| H  | -1.722899 | 0.613215  | -6.612586 |
| H  | -1.982031 | -0.527334 | -5.325765 |
| H  | 0.037805  | 3.239597  | -6.450725 |
| H  | -3.110949 | 1.249326  | -3.945481 |
| H  | -3.800385 | 3.390415  | -5.059411 |
| H  | -2.044358 | 3.312695  | -4.870153 |
| H  | -2.781526 | 2.994922  | -6.448458 |
| H  | 0.585753  | 4.077416  | -4.889241 |
| H  | 2.348316  | 2.762639  | -7.039571 |
| H  | 3.923605  | 4.424501  | -5.893824 |
| H  | 3.026329  | 4.213897  | -4.376579 |
| H  | 3.974291  | 2.876409  | -5.065495 |

E = -658.120974388

G = -657.835467

*Transition state*

|    |           |           |           |
|----|-----------|-----------|-----------|
| C  | 2.870367  | -0.294258 | -5.937902 |
| C  | 2.848278  | -1.243878 | -4.885147 |
| C  | 1.674278  | -2.027857 | -5.027853 |
| C  | 0.970511  | -1.557957 | -6.164851 |
| C  | 1.708985  | -0.486253 | -6.725449 |
| Sm | 0.779662  | 0.466679  | -4.289409 |
| C  | 1.198924  | 1.414386  | -1.732944 |
| C  | 1.386974  | 0.011122  | -1.655295 |
| C  | 0.126859  | -0.610299 | -1.852695 |
| C  | -0.838299 | 0.410912  | -2.045716 |
| C  | -0.175607 | 1.659967  | -1.974160 |
| C  | 0.855200  | 2.897661  | -5.139429 |
| C  | 1.619222  | 3.280706  | -6.181803 |
| C  | 2.328422  | 4.593232  | -6.336505 |
| C  | -1.409559 | 1.141361  | -5.567674 |
| C  | -2.578808 | 2.084609  | -5.261670 |
| H  | -3.538815 | 1.569022  | -5.412389 |
| C  | -2.569284 | 3.350339  | -6.118285 |
| H  | 1.966355  | 2.168346  | -1.597836 |
| H  | 2.320346  | -0.497061 | -1.442920 |
| H  | -0.069994 | -1.675372 | -1.811789 |
| H  | -1.902133 | 0.263394  | -2.191416 |
| H  | -0.641980 | 2.633485  | -2.064505 |
| H  | 3.651803  | 0.433713  | -6.122264 |
| H  | 3.617015  | -1.381063 | -4.133449 |
| H  | 1.388106  | -2.864394 | -4.401040 |
| H  | 0.046776  | -1.967452 | -6.557405 |
| H  | 1.444254  | 0.066965  | -7.618599 |
| H  | -1.349808 | 0.946300  | -6.647358 |
| H  | -1.640480 | 0.153098  | -5.111775 |
| H  | -0.231617 | 2.050883  | -5.365697 |
| H  | -2.558534 | 2.367979  | -4.200125 |
| H  | -3.415444 | 4.001599  | -5.874209 |
| H  | -1.649036 | 3.925355  | -5.975302 |
| H  | -2.638289 | 3.100720  | -7.183514 |
| H  | 0.731097  | 3.647693  | -4.347953 |
| H  | 1.738949  | 2.597569  | -7.028111 |
| H  | 1.974616  | 5.126069  | -7.229202 |
| H  | 2.174642  | 5.238805  | -5.466928 |
| H  | 3.407694  | 4.447814  | -6.472840 |

E = -658.091864736

G = -657.808867

*Adduct of propane on Cp<sub>2</sub>SmCH=CH-CH<sub>3</sub>*

|    |           |           |           |
|----|-----------|-----------|-----------|
| C  | 2.929425  | -0.338713 | -5.952242 |
| C  | 2.873365  | -1.302600 | -4.911476 |
| C  | 1.649801  | -2.010329 | -5.034340 |
| C  | 0.942472  | -1.471045 | -6.134862 |
| C  | 1.734886  | -0.436694 | -6.702418 |
| Sm | 0.976473  | 0.540065  | -4.223908 |
| C  | 1.284996  | 1.380563  | -1.623233 |
| C  | 1.473573  | -0.026016 | -1.598728 |
| C  | 0.220223  | -0.640606 | -1.852474 |
| C  | -0.737109 | 0.385223  | -2.044633 |
| C  | -0.077323 | 1.634686  | -1.903822 |
| C  | 1.719188  | 2.808058  | -4.795631 |
| C  | 2.236920  | 3.239191  | -5.967300 |
| C  | 2.586759  | 4.655476  | -6.336982 |
| C  | -1.762580 | 1.263602  | -5.726277 |
| C  | -2.969163 | 2.121588  | -5.345198 |
| H  | -3.864656 | 1.488839  | -5.313708 |
| C  | -3.189980 | 3.282200  | -6.312148 |
| H  | 2.047865  | 2.129975  | -1.450901 |
| H  | 2.399466  | -0.541221 | -1.370549 |
| H  | 0.024364  | -1.706331 | -1.862820 |
| H  | -1.798906 | 0.240657  | -2.212455 |
| H  | -0.538610 | 2.612919  | -1.970590 |
| H  | 3.743786  | 0.349831  | -6.138983 |
| H  | 3.655321  | -1.503987 | -4.188321 |
| H  | 1.325070  | -2.833528 | -4.408906 |
| H  | -0.011898 | -1.822474 | -6.511650 |
| H  | 1.484676  | 0.150962  | -7.578031 |
| H  | -1.869903 | 0.829556  | -6.725527 |
| H  | -1.662075 | 0.420912  | -5.022721 |
| H  | -0.851677 | 1.884732  | -5.744066 |
| H  | -2.831180 | 2.509991  | -4.328922 |
| H  | -4.058124 | 3.881111  | -6.020054 |
| H  | -2.319393 | 3.946584  | -6.337953 |
| H  | -3.362790 | 2.921433  | -7.332243 |
| H  | 1.568114  | 3.636238  | -4.082173 |
| H  | 2.448773  | 2.516212  | -6.763703 |
| H  | 2.039615  | 4.984424  | -7.231083 |
| H  | 2.357701  | 5.348236  | -5.520949 |
| H  | 3.654132  | 4.751941  | -6.578958 |

E = -658.127442300

G = -657.844873

**Cp<sub>2</sub>SmCH<sub>2</sub>CH<sub>2</sub>CH<sub>3</sub> + SiH<sub>4</sub> : Si-H activation (Si at  $\alpha$  position at the TS)**

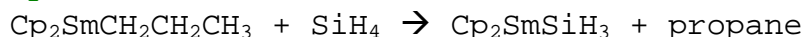

Adduct of SiH<sub>4</sub> on Cp<sub>2</sub>SmCH<sub>2</sub>CH<sub>2</sub>CH<sub>3</sub>

|    |           |           |           |
|----|-----------|-----------|-----------|
| C  | 1.765649  | 0.397114  | -2.018578 |
| C  | 1.246639  | -0.776321 | -2.625416 |
| C  | -0.135059 | -0.576206 | -2.847782 |
| C  | -0.471104 | 0.727194  | -2.392602 |
| C  | 0.703741  | 1.329272  | -1.883913 |
| Sm | 0.178655  | -0.701812 | -0.091212 |
| C  | 0.724082  | -3.104245 | -0.236896 |
| C  | 0.191417  | -4.053411 | 0.843420  |
| C  | 0.432297  | -5.541502 | 0.562593  |
| C  | -0.448831 | 0.438199  | 2.369669  |
| C  | 0.618484  | 1.207748  | 1.847353  |
| C  | 1.777444  | 0.389495  | 1.828710  |
| C  | 1.426172  | -0.882332 | 2.354066  |
| C  | 0.051640  | -0.854247 | 2.681096  |
| Si | -3.681372 | -0.477406 | 0.081399  |
| H  | -4.275131 | -0.950430 | 1.360439  |
| H  | -4.537015 | -0.831307 | -1.083098 |
| H  | -3.414060 | 0.986190  | 0.123006  |
| H  | -2.372102 | -1.196805 | -0.102295 |
| H  | 2.769929  | 0.700431  | 1.523346  |
| H  | 0.567653  | 2.246811  | 1.544191  |
| H  | -1.455567 | 0.795278  | 2.558821  |
| H  | -0.511406 | -1.668763 | 3.121640  |
| H  | 2.094839  | -1.722929 | 2.490658  |
| H  | -0.810074 | -1.281280 | -3.319760 |
| H  | -1.444203 | 1.200060  | -2.470796 |
| H  | 0.785915  | 2.335118  | -1.489826 |
| H  | 2.803154  | 0.574064  | -1.758762 |
| H  | 1.808858  | -1.666533 | -2.877531 |
| H  | 1.816145  | -3.242924 | -0.328059 |
| H  | 0.326967  | -3.430445 | -1.216995 |
| H  | 0.641774  | -3.805200 | 1.814965  |
| H  | -0.893245 | -3.906940 | 0.984073  |
| H  | 0.039415  | -6.185980 | 1.359627  |
| H  | -0.044611 | -5.842770 | -0.377599 |
| H  | 1.504660  | -5.746443 | 0.463152  |

E = -546.532286564

G = -546.298756

*Transition state*

|    |           |           |           |
|----|-----------|-----------|-----------|
| C  | 1.335567  | 1.129334  | -1.987787 |
| C  | 1.444552  | -0.184490 | -2.514775 |
| C  | 0.140914  | -0.642570 | -2.825390 |
| C  | -0.776974 | 0.383734  | -2.485671 |
| C  | -0.037710 | 1.479841  | -1.969340 |
| Sm | 0.220183  | -0.479920 | -0.068450 |
| C  | 0.043238  | -3.023239 | -0.218491 |
| C  | -0.421735 | -4.141122 | 0.708966  |
| C  | 0.263312  | -5.488610 | 0.471286  |
| C  | 0.147546  | 1.101011  | 2.173677  |
| C  | 1.506497  | 1.086993  | 1.773672  |
| C  | 2.012472  | -0.221952 | 1.987940  |
| C  | 0.967894  | -1.012359 | 2.531691  |
| C  | -0.185043 | -0.196936 | 2.643751  |
| Si | -2.803238 | -1.198823 | 0.216135  |
| H  | -3.430944 | -1.715794 | 1.472308  |
| H  | -3.674756 | -1.582017 | -0.938893 |
| H  | -2.863099 | 0.308255  | 0.307237  |
| H  | -1.303668 | -2.046790 | 0.004884  |
| H  | 3.033980  | -0.544195 | 1.818007  |
| H  | 2.069166  | 1.934605  | 1.400754  |
| H  | -0.509959 | 1.962957  | 2.164131  |
| H  | -1.138660 | -0.497001 | 3.061928  |
| H  | 1.046984  | -2.048185 | 2.837747  |
| H  | -0.109651 | -1.597097 | -3.271362 |
| H  | -1.848767 | 0.357076  | -2.643935 |
| H  | -0.446859 | 2.432931  | -1.653902 |
| H  | 2.159996  | 1.768058  | -1.693105 |
| H  | 2.368613  | -0.723880 | -2.691683 |
| H  | 1.147202  | -2.898980 | -0.097508 |
| H  | -0.105985 | -3.317287 | -1.266307 |
| H  | -0.277473 | -3.842090 | 1.755923  |
| H  | -1.508065 | -4.271020 | 0.591498  |
| H  | -0.116498 | -6.262187 | 1.148901  |
| H  | 0.101539  | -5.834446 | -0.555933 |
| H  | 1.345964  | -5.412578 | 0.625146  |

E = -546.520569708

G = -546.282468

*Adduct of propane on Cp<sub>2</sub>SmSiH<sub>3</sub>*

|    |           |           |           |
|----|-----------|-----------|-----------|
| C  | 1.364818  | 0.940785  | -1.939211 |
| C  | 1.164646  | -0.356170 | -2.473702 |
| C  | -0.215154 | -0.497538 | -2.775073 |
| C  | -0.867997 | 0.711817  | -2.432536 |
| C  | 0.107577  | 1.598907  | -1.907700 |
| Sm | -0.089640 | -0.348179 | -0.029898 |
| C  | -0.080519 | -3.478992 | -0.275166 |
| C  | -0.117730 | -4.717107 | 0.621087  |
| C  | 1.099056  | -5.619404 | 0.433672  |
| C  | 0.432748  | 1.369982  | 2.002180  |
| C  | 1.687350  | 0.778431  | 1.701807  |
| C  | 1.634316  | -0.580933 | 2.097705  |
| C  | 0.348247  | -0.827349 | 2.646190  |
| C  | -0.392656 | 0.378478  | 2.593784  |
| Si | -3.082423 | -0.419312 | 0.270047  |
| H  | -3.652669 | -1.157021 | 1.466407  |
| H  | -3.910121 | -0.971692 | -0.874094 |
| H  | -3.670717 | 0.967716  | 0.445917  |
| H  | -0.992785 | -2.876631 | -0.123599 |
| H  | 2.452206  | -1.291012 | 2.039830  |
| H  | 2.547280  | 1.285955  | 1.281813  |
| H  | 0.167584  | 2.410215  | 1.851912  |
| H  | -1.399880 | 0.522936  | 2.962818  |
| H  | 0.003483  | -1.763006 | 3.071354  |
| H  | -0.686294 | -1.364347 | -3.224273 |
| H  | -1.919851 | 0.927144  | -2.569984 |
| H  | -0.068248 | 2.618988  | -1.585865 |
| H  | 2.315614  | 1.368364  | -1.644899 |
| H  | 1.939476  | -1.090949 | -2.664260 |
| H  | 0.831354  | -2.895608 | -0.054690 |
| H  | -0.039953 | -3.746593 | -1.335551 |
| H  | -0.192628 | -4.405046 | 1.669382  |
| H  | -1.034334 | -5.277667 | 0.403674  |
| H  | 1.040240  | -6.500319 | 1.079911  |
| H  | 1.178311  | -5.971101 | -0.600915 |
| H  | 2.028525  | -5.091957 | 0.677138  |

E = -546.566856480

G = -546.326755

**Cp<sub>2</sub>SmCH<sub>2</sub>CH<sub>2</sub>CH<sub>3</sub> + SiH<sub>4</sub> : Si-H activation (Si at β position at the TS)**

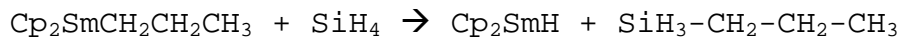

*Transition state*

|    |           |           |           |
|----|-----------|-----------|-----------|
| C  | 0.734768  | -3.828079 | -2.489900 |
| C  | 1.819015  | -2.979879 | -2.150589 |
| C  | 2.691296  | -3.706868 | -1.301318 |
| C  | 2.150170  | -5.006935 | -1.126928 |
| C  | 0.941347  | -5.081229 | -1.858413 |
| Sm | 0.380341  | -3.286861 | 0.161244  |
| C  | -1.200738 | -1.391576 | -0.966655 |
| C  | -2.053093 | -2.054515 | -0.051149 |
| C  | -1.623921 | -1.729734 | 1.261967  |
| C  | -0.502045 | -0.871948 | 1.155888  |
| C  | -0.235683 | -0.664311 | -0.222339 |
| Si | -1.449761 | -5.008926 | 2.124746  |
| C  | 0.423590  | -4.167992 | 2.732023  |
| C  | 1.857999  | -4.694901 | 2.482182  |
| Si | 1.982800  | -6.599879 | 2.664573  |
| C  | 2.867113  | -4.018163 | 3.427563  |
| H  | -2.813123 | -5.003999 | 1.442371  |
| H  | -1.110703 | -6.447974 | 2.361215  |
| H  | -1.966041 | -4.441319 | 3.450546  |
| H  | -2.097152 | -2.050976 | 2.182272  |
| H  | 0.031479  | -0.414965 | 1.982276  |
| H  | 0.531690  | -0.018586 | -0.633467 |
| H  | -1.287141 | -1.410257 | -2.045755 |
| H  | -2.899536 | -2.682909 | -0.300383 |
| H  | 3.637573  | -3.350936 | -0.907842 |
| H  | 2.604822  | -5.820041 | -0.573957 |
| H  | 0.301531  | -5.950623 | -1.943446 |
| H  | -0.084819 | -3.580008 | -3.153286 |
| H  | 1.973482  | -1.968811 | -2.507952 |
| H  | -0.923613 | -4.911681 | 0.486609  |
| H  | 2.843891  | -2.925872 | 3.320262  |
| H  | 2.628075  | -4.240038 | 4.473793  |
| H  | 3.893691  | -4.352172 | 3.240608  |
| H  | 2.227075  | -4.516975 | 1.452425  |
| H  | 0.159724  | -4.454636 | 3.755109  |
| H  | 0.429281  | -3.060256 | 2.804392  |
| H  | 1.424641  | -7.010969 | 3.988282  |
| H  | 1.279484  | -7.327495 | 1.569307  |
| H  | 3.432651  | -6.974821 | 2.618707  |

E = -551.605342753

G = -551.349882

*SiH<sub>3</sub>-CH<sub>2</sub>-CH<sub>2</sub>-CH<sub>3</sub> ('linear' hydrosilylation product)*

|    |           |           |           |
|----|-----------|-----------|-----------|
| H  | -0.128379 | 0.058547  | 1.839349  |
| Si | -0.025272 | -0.075569 | 0.351520  |
| H  | -0.770503 | 1.066549  | -0.266882 |
| C  | 1.790321  | -0.069821 | -0.199026 |
| C  | 2.555235  | 1.206072  | 0.177771  |
| C  | 4.015159  | 1.181302  | -0.273020 |
| H  | -0.702056 | -1.348616 | -0.051353 |
| H  | 2.281762  | -0.948694 | 0.239284  |
| H  | 1.816930  | -0.220033 | -1.286566 |
| H  | 2.054028  | 2.078481  | -0.261542 |
| H  | 2.513309  | 1.352169  | 1.265067  |
| H  | 4.537167  | 2.102158  | 0.007983  |
| H  | 4.553952  | 0.341228  | 0.179604  |
| H  | 4.090919  | 1.073837  | -1.360997 |

E = -124.206080166

G = -124.117276



**Cp<sub>2</sub>SmCH<sub>2</sub>-CH=CH<sub>2</sub> ( $\pi$ -allylic complex)**

|    |           |           |           |
|----|-----------|-----------|-----------|
| C  | 0.524990  | -0.334951 | 2.617508  |
| C  | 0.002141  | 0.974978  | 2.742967  |
| C  | 0.808881  | 1.845644  | 1.965591  |
| C  | 1.835874  | 1.073366  | 1.366256  |
| C  | 1.655676  | -0.276023 | 1.762510  |
| Sm | -0.456746 | 0.276938  | 0.110233  |
| C  | -0.017478 | -0.541503 | -2.500228 |
| C  | -1.203288 | 0.230043  | -2.574118 |
| C  | -0.867698 | 1.578926  | -2.300813 |
| C  | 0.528345  | 1.642937  | -2.058980 |
| C  | 1.054270  | 0.331426  | -2.182304 |
| C  | -2.130667 | -1.783420 | 0.454996  |
| H  | 0.691892  | 2.920731  | 1.884368  |
| H  | 2.633583  | 1.451835  | 0.738542  |
| H  | 2.299001  | -1.108036 | 1.498080  |
| H  | 0.147070  | -1.222083 | 3.110834  |
| H  | -0.846356 | 1.267281  | 3.349528  |
| H  | -1.551600 | 2.420115  | -2.314559 |
| H  | 1.100459  | 2.541434  | -1.858947 |
| H  | 2.098070  | 0.053495  | -2.093331 |
| H  | 0.062711  | -1.605398 | -2.693145 |
| H  | -2.189072 | -0.141355 | -2.828210 |
| H  | -2.319045 | -1.864096 | -0.616834 |
| H  | -1.874869 | -2.712224 | 0.955300  |
| C  | -2.729543 | -0.747556 | 1.178806  |
| C  | -3.063687 | 0.512467  | 0.672546  |
| H  | -2.713558 | -0.844158 | 2.266675  |
| H  | -3.490097 | 1.262032  | 1.331861  |
| H  | -3.326096 | 0.611542  | -0.382002 |

E = -539.043369530

G = -538.851894

**Cp<sub>2</sub>SmCH<sub>2</sub>-CH=CH<sub>2</sub> + propene : 1,2 insertion**

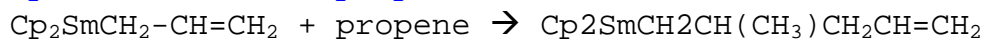

Adduct of propene on Cp<sub>2</sub>SmCH<sub>2</sub>-CH=CH<sub>2</sub>

|    |           |           |           |
|----|-----------|-----------|-----------|
| C  | 1.483979  | 0.917882  | -2.010703 |
| C  | 2.387786  | 0.647641  | -0.957611 |
| C  | 2.540188  | -0.761433 | -0.865571 |
| C  | 1.736024  | -1.354231 | -1.868112 |
| C  | 1.070513  | -0.319171 | -2.568689 |
| Sm | -0.008819 | -0.297464 | 0.005590  |
| C  | -1.263271 | 2.497495  | -0.525563 |
| C  | -2.168448 | 1.866800  | -1.294109 |
| C  | -2.122809 | 1.788533  | -2.788013 |
| C  | -2.441167 | -1.307090 | -0.806291 |
| C  | -1.517709 | -2.330360 | -1.028802 |
| C  | -0.691271 | -2.906055 | -0.062408 |
| H  | 0.020704  | -3.673457 | -0.347231 |
| C  | 0.425125  | 1.206170  | 2.292161  |
| C  | 1.318399  | 0.111032  | 2.383856  |
| C  | 0.556677  | -1.061838 | 2.603487  |
| C  | -0.810982 | -0.688170 | 2.666928  |
| C  | -0.892638 | 0.708220  | 2.476039  |
| H  | -1.018093 | -2.927868 | 0.974897  |
| H  | -2.883308 | -1.194209 | 0.185360  |
| H  | -3.045935 | -0.944107 | -1.630130 |
| H  | -1.268871 | -2.537705 | -2.072406 |
| H  | -0.396976 | 2.991291  | -0.957652 |
| H  | -3.050417 | 1.443012  | -0.817039 |
| H  | -1.415047 | 2.617109  | 0.541480  |
| H  | -1.204537 | 2.222721  | -3.190834 |
| H  | -2.202305 | 0.754465  | -3.137062 |
| H  | -2.973810 | 2.334907  | -3.213765 |
| H  | 0.950995  | -2.061420 | 2.741090  |
| H  | 2.398242  | 0.164429  | 2.317796  |
| H  | 0.705958  | 2.245490  | 2.166067  |
| H  | -1.801941 | 1.297671  | 2.511739  |
| H  | -1.645260 | -1.352072 | 2.860188  |
| H  | 2.901633  | 1.385115  | -0.352582 |
| H  | 3.189803  | -1.288823 | -0.177110 |
| H  | 1.655775  | -2.414466 | -2.070625 |
| H  | 0.408280  | -0.446307 | -3.416692 |
| H  | 1.199209  | 1.901137  | -2.364125 |

E = -656.915969382

G = -656.648884

*Transition state*

|    |           |           |           |
|----|-----------|-----------|-----------|
| C  | 2.031314  | 1.190756  | -1.586038 |
| C  | 2.763577  | 0.448562  | -0.630112 |
| C  | 2.590814  | -0.930595 | -0.916511 |
| C  | 1.765294  | -1.034632 | -2.062996 |
| C  | 1.412972  | 0.272074  | -2.471895 |
| Sm | 0.141049  | -0.068234 | 0.004622  |
| C  | -1.238792 | 1.903890  | -0.769136 |
| C  | -2.332323 | 1.105638  | -1.238364 |
| C  | -2.536015 | 1.041108  | -2.739852 |
| C  | -2.513907 | -0.862500 | -0.741021 |
| C  | -1.603271 | -1.913665 | -1.148280 |
| C  | -0.817883 | -2.664544 | -0.318245 |
| H  | -0.118102 | -3.391146 | -0.716875 |
| C  | 0.550658  | 1.262561  | 2.387479  |
| C  | 1.338954  | 0.087508  | 2.482303  |
| C  | 0.465475  | -1.019228 | 2.597511  |
| C  | -0.865640 | -0.526706 | 2.588708  |
| C  | -0.811206 | 0.880563  | 2.463127  |
| H  | -0.995792 | -2.688376 | 0.754067  |
| H  | -2.741594 | -0.866422 | 0.329206  |
| H  | -3.430422 | -0.860205 | -1.324574 |
| H  | -1.466863 | -2.042595 | -2.223815 |
| H  | -0.608017 | 2.355540  | -1.532604 |
| H  | -3.259630 | 1.247466  | -0.682989 |
| H  | -1.417146 | 2.530804  | 0.100772  |
| H  | -1.611482 | 0.761451  | -3.253829 |
| H  | -3.318948 | 0.338436  | -3.042382 |
| H  | -2.818027 | 2.036070  | -3.103739 |
| H  | 0.764568  | -2.053896 | 2.719374  |
| H  | 2.420956  | 0.044937  | 2.493892  |
| H  | 0.924973  | 2.276950  | 2.312294  |
| H  | -1.661295 | 1.551931  | 2.453151  |
| H  | -1.764930 | -1.119725 | 2.711614  |
| H  | 3.375566  | 0.863018  | 0.161525  |
| H  | 3.050708  | -1.754560 | -0.383425 |
| H  | 1.476944  | -1.955683 | -2.555523 |
| H  | 0.817777  | 0.529721  | -3.339985 |
| H  | 1.983378  | 2.271087  | -1.650263 |

E = -656.890397354

G = -656.619369

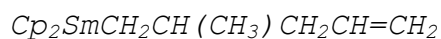

|    |           |           |           |
|----|-----------|-----------|-----------|
| C  | 2.322730  | 1.434778  | -1.216432 |
| C  | 2.986153  | 0.298521  | -0.685268 |
| C  | 2.501935  | -0.845365 | -1.361550 |
| C  | 1.549701  | -0.414351 | -2.323687 |
| C  | 1.443669  | 0.993317  | -2.238910 |
| Sm | 0.366645  | 0.100016  | 0.160761  |
| C  | -1.780104 | 1.170367  | -0.583543 |
| C  | -2.750954 | 0.462314  | -1.542894 |
| C  | -2.314081 | 0.569420  | -3.005547 |
| C  | -2.951223 | -1.008339 | -1.110171 |
| C  | -1.684221 | -1.806821 | -1.128674 |
| C  | -1.156409 | -2.475983 | -0.087238 |
| H  | -0.260160 | -3.085601 | -0.197118 |
| C  | 1.290087  | 1.170928  | 2.514614  |
| C  | 1.557255  | -0.215320 | 2.643672  |
| C  | 0.318293  | -0.888481 | 2.771425  |
| C  | -0.716239 | 0.083006  | 2.730535  |
| C  | -0.116687 | 1.353291  | 2.574881  |
| H  | -1.655435 | -2.503761 | 0.878892  |
| H  | -3.383261 | -1.036427 | -0.102131 |
| H  | -3.672372 | -1.499175 | -1.782233 |
| H  | -1.161103 | -1.855118 | -2.084975 |
| H  | -1.598229 | 2.194996  | -0.950242 |
| H  | -3.756280 | 0.916810  | -1.491528 |
| H  | -2.301679 | 1.307457  | 0.379982  |
| H  | -1.302872 | 0.176677  | -3.158332 |
| H  | -2.995692 | 0.035089  | -3.679118 |
| H  | -2.296244 | 1.619355  | -3.316449 |
| H  | 0.187746  | -1.952929 | 2.931881  |
| H  | 2.538297  | -0.674897 | 2.668954  |
| H  | 2.032463  | 1.956927  | 2.437220  |
| H  | -0.639871 | 2.301014  | 2.525398  |
| H  | -1.778185 | -0.109099 | 2.827569  |
| H  | 3.741594  | 0.308219  | 0.091123  |
| H  | 2.841441  | -1.864393 | -1.210547 |
| H  | 1.040564  | -1.047915 | -3.040848 |
| H  | 0.817476  | 1.624647  | -2.855862 |
| H  | 2.501323  | 2.465875  | -0.932111 |

E = -656.918852885

G = -656.647130

**Cp<sub>2</sub>SmCH<sub>2</sub>-CH=CH<sub>2</sub> + SiH<sub>4</sub> : Si-H activation (Si at α position at the TS)**

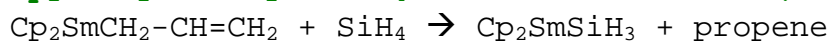

*Transition state*

|    |           |           |           |
|----|-----------|-----------|-----------|
| C  | 1.624535  | 0.821719  | -1.716559 |
| C  | 1.271628  | -0.538411 | -1.537952 |
| C  | -0.136575 | -0.647923 | -1.674807 |
| C  | -0.651237 | 0.642698  | -1.949903 |
| C  | 0.439275  | 1.552244  | -1.976935 |
| Sm | 0.737501  | 0.007805  | -4.206252 |
| C  | 0.393824  | 0.522116  | -6.913440 |
| C  | 0.511056  | 1.795202  | -6.298873 |
| C  | -0.638275 | 1.999636  | -5.495076 |
| C  | -1.462854 | 0.852583  | -5.608208 |
| C  | -0.826555 | -0.058837 | -6.489396 |
| Si | -0.596536 | -2.829281 | -4.339903 |
| C  | 2.550368  | -1.973620 | -4.926712 |
| C  | 3.318721  | -0.906215 | -4.349964 |
| C  | 3.407330  | 0.378222  | -4.834329 |
| H  | 1.088943  | 0.090704  | -7.624567 |
| H  | 1.312962  | 2.507936  | -6.451883 |
| H  | -0.862427 | 2.890533  | -4.920281 |
| H  | -2.427671 | 0.710857  | -5.135921 |
| H  | -1.230103 | -1.007936 | -6.821756 |
| H  | 1.947648  | -1.347133 | -1.286464 |
| H  | 2.622087  | 1.237648  | -1.642244 |
| H  | 0.371695  | 2.623586  | -2.125781 |
| H  | -1.696772 | 0.897965  | -2.074955 |
| H  | -0.721211 | -1.549132 | -1.535125 |
| H  | 2.786187  | -2.972076 | -4.562942 |
| H  | 2.426649  | -1.943190 | -6.011634 |
| H  | 1.062455  | -2.162469 | -4.551482 |
| H  | 3.728269  | -1.090252 | -3.355998 |
| H  | 3.975803  | 1.133078  | -4.302161 |
| H  | 3.133684  | 0.605469  | -5.862548 |
| H  | -1.966494 | -2.267633 | -4.078301 |
| H  | -0.338635 | -3.842031 | -3.262153 |
| H  | -0.696246 | -3.589587 | -5.631281 |

E = -545.313522788

G = -545.093326

**Cp<sub>2</sub>SmCH<sub>2</sub>-CH=CH<sub>2</sub> + SiH<sub>4</sub> : Si-H activation (Si at β position at the TS)**

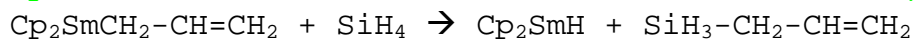

*Transition state*

|    |           |           |           |
|----|-----------|-----------|-----------|
| C  | 1.036774  | -2.978281 | 2.947591  |
| C  | 1.074109  | -3.283212 | 1.561898  |
| C  | 0.479000  | -4.554538 | 1.376781  |
| C  | 0.080389  | -5.039530 | 2.650399  |
| C  | 0.427886  | -4.067485 | 3.619877  |
| Sm | -1.606341 | -2.964593 | 2.151204  |
| C  | -3.696799 | -2.907464 | 0.337333  |
| C  | -4.322621 | -2.902833 | 1.608352  |
| C  | -4.078452 | -4.156735 | 2.222662  |
| C  | -3.294900 | -4.933253 | 1.334799  |
| C  | -3.054486 | -4.159252 | 0.168059  |
| C  | -0.958381 | -0.452336 | 0.922264  |
| C  | -1.865760 | -0.237386 | 1.910330  |
| C  | -1.599328 | -0.153199 | 3.351891  |
| Si | -1.960452 | -1.367818 | 5.094352  |
| H  | -1.536986 | -0.071155 | 5.794493  |
| H  | -1.063198 | -2.294824 | 5.880354  |
| H  | -3.406299 | -1.442869 | 5.492424  |
| H  | -2.523042 | -4.489534 | -0.716902 |
| H  | -3.734331 | -2.110052 | -0.396058 |
| H  | -4.921006 | -2.101026 | 2.025296  |
| H  | -4.445363 | -4.470162 | 3.192162  |
| H  | -2.969676 | -5.953573 | 1.498126  |
| H  | 1.521080  | -2.674204 | 0.784730  |
| H  | 0.386281  | -5.083769 | 0.435909  |
| H  | -0.377267 | -6.001170 | 2.850266  |
| H  | 0.267304  | -4.143869 | 4.687964  |
| H  | 1.451190  | -2.094320 | 3.418584  |
| H  | -2.241649 | -2.763135 | 4.133191  |
| H  | -2.914100 | -0.161529 | 1.614082  |
| H  | 0.109038  | -0.472226 | 1.128739  |
| H  | -1.262034 | -0.480319 | -0.120042 |
| H  | -0.569392 | 0.148295  | 3.562502  |
| H  | -2.279445 | 0.583820  | 3.787253  |

E = -545.301154788

G = -545.079480

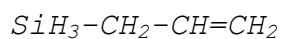

|    |           |           |           |
|----|-----------|-----------|-----------|
| H  | -0.335835 | 0.354396  | 1.684191  |
| Si | -0.078010 | 0.021072  | 0.250693  |
| H  | -0.714056 | 1.067972  | -0.610528 |
| C  | -0.778989 | -1.704663 | -0.164038 |
| C  | -0.065197 | -2.784862 | 0.587726  |
| C  | -0.566464 | -3.478773 | 1.611481  |
| H  | 1.398657  | 0.048829  | 0.012137  |
| H  | -1.850246 | -1.703541 | 0.067273  |
| H  | -0.678838 | -1.848045 | -1.247550 |
| H  | 0.958697  | -2.986415 | 0.269979  |
| H  | 0.019966  | -4.234521 | 2.125366  |
| H  | -1.580495 | -3.316334 | 1.970560  |

E = -122.965540616

G = -122.899871

**Cp<sub>2</sub>SmSiH<sub>3</sub> (silyl complex)**

|    |           |           |           |
|----|-----------|-----------|-----------|
| Sm | 0.012178  | 0.013956  | -0.055232 |
| C  | 2.717161  | 0.446808  | 0.083382  |
| C  | 2.575666  | -0.905991 | -0.310994 |
| C  | 2.025039  | -0.921480 | -1.619741 |
| C  | 1.838723  | 0.421996  | -2.036394 |
| C  | 2.262398  | 1.268920  | -0.981395 |
| C  | -2.671303 | 0.522888  | 0.242215  |
| C  | -2.216176 | 1.470050  | -0.712783 |
| C  | -1.857685 | 0.766744  | -1.890007 |
| C  | -2.084640 | -0.615234 | -1.659263 |
| C  | -2.596116 | -0.763898 | -0.343066 |
| H  | 3.134369  | 0.790319  | 1.023565  |
| H  | 2.858054  | -1.771854 | 0.274441  |
| H  | 1.829896  | -1.805269 | -2.216811 |
| H  | 1.473499  | 0.744348  | -3.004086 |
| H  | 2.285375  | 2.353091  | -1.007688 |
| H  | -3.042962 | 0.743361  | 1.236439  |
| H  | -2.197243 | 2.547282  | -0.585750 |
| H  | -1.509858 | 1.209521  | -2.815597 |
| H  | -1.947184 | -1.411062 | -2.382679 |
| H  | -2.895282 | -1.692513 | 0.126324  |
| Si | -0.002566 | -2.047720 | 2.140529  |
| H  | -1.177208 | -2.074483 | 3.096339  |
| H  | -0.001463 | -3.463900 | 1.596108  |
| H  | 1.187329  | -2.068744 | 3.078551  |

E = -427.451102323

G = -427.307459



**Cp<sub>2</sub>SmSiH<sub>3</sub> + propene : 1,2 insertion**

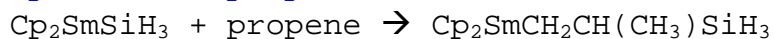

*Adduct of propene on Cp<sub>2</sub>SmSiH<sub>3</sub>*

|    |           |          |           |
|----|-----------|----------|-----------|
| C  | 1.295378  | 2.602616 | 0.900099  |
| C  | 1.438841  | 4.000836 | 0.723746  |
| C  | 0.891853  | 4.345072 | -0.540184 |
| C  | 0.405386  | 3.159083 | -1.143518 |
| C  | 0.649182  | 2.083468 | -0.251081 |
| Sm | -1.281516 | 3.561786 | 0.966087  |
| C  | -3.230292 | 2.007595 | -0.112414 |
| C  | -3.218907 | 3.175518 | -0.918705 |
| C  | -3.713021 | 4.249013 | -0.137302 |
| C  | -4.032074 | 3.744154 | 1.149600  |
| C  | -3.739107 | 2.358304 | 1.164790  |
| C  | -1.278756 | 6.381296 | 1.917003  |
| C  | -1.055857 | 5.919864 | 3.160632  |
| C  | -2.058172 | 5.905459 | 4.266767  |
| Si | -0.997418 | 2.227590 | 3.655090  |
| H  | -0.776168 | 0.728062 | 3.619135  |
| H  | -4.461695 | 4.308428 | 1.969196  |
| H  | -3.899425 | 1.683665 | 1.995903  |
| H  | -2.945305 | 1.011800 | -0.431741 |
| H  | -2.923555 | 3.228784 | -1.959656 |
| H  | -3.866072 | 5.266097 | -0.481703 |
| H  | -0.038143 | 3.081589 | -2.128796 |
| H  | 0.423329  | 1.039602 | -0.435796 |
| H  | 1.643987  | 2.028967 | 1.749234  |
| H  | 1.928249  | 4.678607 | 1.414226  |
| H  | 0.893333  | 5.331312 | -0.991951 |
| H  | -3.036943 | 6.263173 | 3.936542  |
| H  | -1.711223 | 6.549404 | 5.084280  |
| H  | -2.166259 | 4.898751 | 4.684707  |
| H  | -0.059661 | 5.552873 | 3.414259  |
| H  | -2.244671 | 6.790984 | 1.629984  |
| H  | -0.470835 | 6.452200 | 1.188824  |
| H  | -2.144926 | 2.349644 | 4.643827  |
| H  | 0.176300  | 2.692613 | 4.502423  |

E = -545.336626660

G = -545.119047

*Transition state*

|    |           |          |           |
|----|-----------|----------|-----------|
| C  | 1.351525  | 2.537120 | 0.987340  |
| C  | 1.508028  | 3.907350 | 0.666337  |
| C  | 0.953877  | 4.125030 | -0.618745 |
| C  | 0.456738  | 2.884586 | -1.096153 |
| C  | 0.698218  | 1.903432 | -0.101223 |
| Sm | -1.239841 | 3.526572 | 0.953441  |
| C  | -3.211313 | 2.319685 | -0.516294 |
| C  | -3.411799 | 3.713358 | -0.709046 |
| C  | -3.870376 | 4.262528 | 0.513537  |
| C  | -3.935665 | 3.216135 | 1.467586  |
| C  | -3.535011 | 2.013697 | 0.825853  |
| C  | -1.107398 | 5.940066 | 1.814485  |
| C  | -1.049595 | 5.506778 | 3.160870  |
| C  | -2.154121 | 5.916814 | 4.117365  |
| Si | -1.132820 | 3.106994 | 3.815850  |
| H  | -1.086430 | 1.873900 | 2.870944  |
| H  | -4.293129 | 3.301201 | 2.486873  |
| H  | -3.509559 | 1.029602 | 1.279045  |
| H  | -2.894882 | 1.611894 | -1.273325 |
| H  | -3.288943 | 4.249844 | -1.643258 |
| H  | -4.156834 | 5.293795 | 0.678101  |
| H  | 0.008140  | 2.709495 | -2.067020 |
| H  | 0.465080  | 0.847638 | -0.177746 |
| H  | 1.703977  | 2.049109 | 1.888374  |
| H  | 1.997926  | 4.651354 | 1.283318  |
| H  | 0.948904  | 5.063740 | -1.160961 |
| H  | -3.142571 | 5.731593 | 3.687497  |
| H  | -2.069311 | 6.995860 | 4.301038  |
| H  | -2.106413 | 5.411086 | 5.086575  |
| H  | -0.056252 | 5.496643 | 3.609935  |
| H  | -2.012897 | 6.443272 | 1.481768  |
| H  | -0.183730 | 6.263411 | 1.340454  |
| H  | -2.315616 | 2.834739 | 4.698020  |
| H  | 0.083968  | 2.949414 | 4.681798  |

E = -545.323492562

G = -545.098845

*Cp*<sub>2</sub>SmCH<sub>2</sub>CH(CH<sub>3</sub>)SiH<sub>3</sub>

|    |           |          |           |
|----|-----------|----------|-----------|
| C  | 1.311159  | 3.059110 | 1.015444  |
| C  | 1.152504  | 4.368170 | 0.502083  |
| C  | 0.657451  | 4.258942 | -0.823328 |
| C  | 0.527544  | 2.879941 | -1.132716 |
| C  | 0.922559  | 2.137991 | 0.005666  |
| Sm | -1.424300 | 3.403352 | 0.733628  |
| C  | -3.188012 | 1.906148 | -0.760464 |
| C  | -3.240606 | 3.212200 | -1.310499 |
| C  | -3.864858 | 4.062483 | -0.359949 |
| C  | -4.192803 | 3.285384 | 0.775411  |
| C  | -3.772105 | 1.952423 | 0.530309  |
| C  | -1.629699 | 5.303723 | 2.354482  |
| C  | -0.867139 | 5.052603 | 3.672723  |
| C  | -1.031150 | 6.133935 | 4.751242  |
| Si | -1.443896 | 3.342588 | 4.234399  |
| H  | -1.301153 | 2.387899 | 3.043779  |
| H  | -4.695827 | 3.642018 | 1.665740  |
| H  | -3.919046 | 1.107448 | 1.194238  |
| H  | -2.799763 | 1.023118 | -1.254946 |
| H  | -2.910141 | 3.498186 | -2.302411 |
| H  | -4.076670 | 5.117596 | -0.489947 |
| H  | 0.202291  | 2.467903 | -2.080611 |
| H  | 0.968062  | 1.056748 | 0.076408  |
| H  | 1.705208  | 2.801391 | 1.992036  |
| H  | 1.387857  | 5.289636 | 1.019453  |
| H  | 0.467793  | 5.083435 | -1.501795 |
| H  | -2.082661 | 6.245046 | 5.040394  |
| H  | -0.700700 | 7.104613 | 4.361459  |
| H  | -0.451305 | 5.923711 | 5.659514  |
| H  | 0.207378  | 4.943098 | 3.457308  |
| H  | -2.688744 | 5.496798 | 2.590326  |
| H  | -1.257872 | 6.237270 | 1.897071  |
| H  | -2.899653 | 3.308618 | 4.574495  |
| H  | -0.679488 | 2.656850 | 5.326702  |

E = -545.343148018

G = -545.119505

**Cp<sub>2</sub>SmSiH<sub>3</sub> + propene : 2,1 insertion**

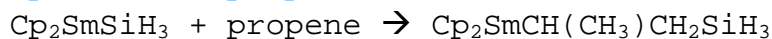

*Adduct of propene on Cp<sub>2</sub>SmSiH<sub>3</sub>*

|    |           |          |           |
|----|-----------|----------|-----------|
| C  | -3.209095 | 2.093835 | 0.126699  |
| C  | -2.976270 | 3.162371 | -0.778375 |
| C  | -3.336388 | 4.367837 | -0.128452 |
| C  | -3.792480 | 4.044458 | 1.176418  |
| C  | -3.721140 | 2.639454 | 1.331938  |
| Sm | -1.089102 | 3.419217 | 1.179513  |
| C  | 0.480249  | 1.501127 | 0.073387  |
| C  | 1.106598  | 1.775657 | 1.315928  |
| C  | 1.656712  | 3.078870 | 1.247288  |
| C  | 1.380288  | 3.607036 | -0.039427 |
| C  | 0.651849  | 2.632710 | -0.766534 |
| C  | -1.169436 | 6.655140 | 1.577779  |
| C  | -0.333745 | 6.014318 | 2.412856  |
| H  | -0.693373 | 5.542082 | 3.327193  |
| Si | -1.288736 | 2.357928 | 3.986195  |
| H  | -1.561181 | 0.867192 | 4.049457  |
| H  | -4.026157 | 2.080882 | 2.207396  |
| H  | -3.067313 | 1.040137 | -0.083002 |
| H  | -2.626606 | 3.068073 | -1.799436 |
| H  | -3.322617 | 5.356360 | -0.573887 |
| H  | -4.174050 | 4.740666 | 1.914445  |
| H  | 0.327604  | 2.716921 | -1.796858 |
| H  | -0.002965 | 0.571521 | -0.203314 |
| H  | 1.174557  | 1.101613 | 2.160261  |
| H  | 2.221800  | 3.566585 | 2.033024  |
| H  | 1.709553  | 4.567395 | -0.421123 |
| H  | 0.741789  | 6.013915 | 2.249076  |
| H  | -2.232929 | 6.671997 | 1.817175  |
| C  | -0.753054 | 7.413771 | 0.357847  |
| H  | -2.389889 | 2.914249 | 4.871559  |
| H  | -0.070027 | 2.492779 | 4.881214  |
| H  | -1.006819 | 8.474365 | 0.474757  |
| H  | 0.322106  | 7.336899 | 0.176008  |
| H  | -1.286622 | 7.064878 | -0.533639 |

E = -545.335648235

G = -545.116546

*Transition state*

|    |           |          |           |
|----|-----------|----------|-----------|
| C  | -3.415275 | 1.906947 | 0.782074  |
| C  | -3.205511 | 2.380068 | -0.535567 |
| C  | -3.487316 | 3.772125 | -0.551690 |
| C  | -3.881206 | 4.152891 | 0.753974  |
| C  | -3.829270 | 3.004582 | 1.582734  |
| Sm | -1.187386 | 3.489850 | 0.937371  |
| C  | 0.517619  | 1.736724 | -0.301281 |
| C  | 1.200901  | 2.083777 | 0.889931  |
| C  | 1.585150  | 3.444617 | 0.796168  |
| C  | 1.149453  | 3.937573 | -0.459785 |
| C  | 0.486680  | 2.883377 | -1.137630 |
| C  | -1.106495 | 6.049646 | 1.611134  |
| C  | -1.292347 | 5.614189 | 2.934588  |
| H  | -2.300746 | 5.569374 | 3.338182  |
| Si | -0.956114 | 3.299949 | 3.804848  |
| H  | -1.054885 | 1.943968 | 3.055764  |
| H  | -4.114301 | 2.957309 | 2.627080  |
| H  | -3.310600 | 0.880703 | 1.114622  |
| H  | -2.912667 | 1.780117 | -1.388937 |
| H  | -3.456217 | 4.416628 | -1.423237 |
| H  | -4.202745 | 5.141953 | 1.057959  |
| H  | 0.071818  | 2.930197 | -2.138004 |
| H  | 0.123142  | 0.757764 | -0.547476 |
| H  | 1.414390  | 1.418438 | 1.717999  |
| H  | 2.155052  | 3.994053 | 1.535947  |
| H  | 1.330148  | 4.931010 | -0.850923 |
| H  | -0.533247 | 5.864425 | 3.676286  |
| H  | -2.015749 | 6.304748 | 1.065034  |
| C  | 0.142704  | 6.806539 | 1.216761  |
| H  | -2.042653 | 3.248582 | 4.837915  |
| H  | 0.343905  | 3.226587 | 4.553502  |
| H  | 0.117753  | 7.840925 | 1.591249  |
| H  | 1.047843  | 6.342367 | 1.623748  |
| H  | 0.266156  | 6.866760 | 0.131402  |

E = -545.319765258

G = -545.096801

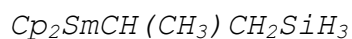

|    |           |          |           |
|----|-----------|----------|-----------|
| C  | -3.440318 | 1.820389 | 0.745778  |
| C  | -3.252318 | 2.211237 | -0.600802 |
| C  | -3.490737 | 3.607268 | -0.689196 |
| C  | -3.847831 | 4.075372 | 0.601726  |
| C  | -3.810004 | 2.973681 | 1.488992  |
| Sm | -1.170025 | 3.402861 | 0.754642  |
| C  | 0.466968  | 1.664521 | -0.613109 |
| C  | 1.200653  | 1.985177 | 0.555449  |
| C  | 1.588410  | 3.347994 | 0.471066  |
| C  | 1.093589  | 3.868700 | -0.746916 |
| C  | 0.393892  | 2.830821 | -1.417300 |
| C  | -1.022540 | 5.712593 | 1.771209  |
| C  | -1.640185 | 5.571967 | 3.184336  |
| H  | -2.713464 | 5.344310 | 3.131142  |
| Si | -0.853408 | 4.150973 | 4.149157  |
| H  | -0.813415 | 2.933151 | 3.220392  |
| H  | -4.069631 | 2.993491 | 2.541469  |
| H  | -3.363262 | 0.810005 | 1.132152  |
| H  | -2.988993 | 1.557271 | -1.423519 |
| H  | -3.464282 | 4.200811 | -1.596466 |
| H  | -4.121829 | 5.091626 | 0.856125  |
| H  | -0.065925 | 2.899934 | -2.396494 |
| H  | 0.058905  | 0.692283 | -0.864058 |
| H  | 1.462263  | 1.297360 | 1.352215  |
| H  | 2.182514  | 3.889011 | 1.197126  |
| H  | 1.245177  | 4.876749 | -1.114368 |
| H  | -1.558243 | 6.492615 | 3.791861  |
| H  | -1.706774 | 6.356581 | 1.192485  |
| C  | 0.323758  | 6.435334 | 1.845494  |
| H  | -1.616331 | 3.670911 | 5.343625  |
| H  | 0.572678  | 4.352868 | 4.541576  |
| H  | 0.258808  | 7.407357 | 2.367242  |
| H  | 1.088105  | 5.854792 | 2.380584  |
| H  | 0.731205  | 6.638156 | 0.848367  |

E = -545.337694183

G = -545.113894

**Cp<sub>2</sub>SmSiH<sub>3</sub> + propene : allylic activation**

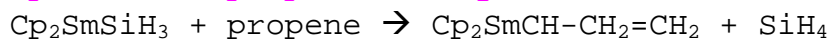

*Transition state*

|    |           |           |           |
|----|-----------|-----------|-----------|
| C  | 1.624535  | 0.821719  | -1.716559 |
| C  | 1.271628  | -0.538411 | -1.537952 |
| C  | -0.136575 | -0.647923 | -1.674807 |
| C  | -0.651237 | 0.642698  | -1.949903 |
| C  | 0.439275  | 1.552244  | -1.976935 |
| Sm | 0.737501  | 0.007805  | -4.206252 |
| C  | 0.393824  | 0.522116  | -6.913440 |
| C  | 0.511056  | 1.795202  | -6.298873 |
| C  | -0.638275 | 1.999636  | -5.495076 |
| C  | -1.462854 | 0.852583  | -5.608208 |
| C  | -0.826555 | -0.058837 | -6.489396 |
| Si | -0.596536 | -2.829281 | -4.339903 |
| C  | 2.550368  | -1.973620 | -4.926712 |
| C  | 3.318721  | -0.906215 | -4.349964 |
| C  | 3.407330  | 0.378222  | -4.834329 |
| H  | 1.088943  | 0.090704  | -7.624567 |
| H  | 1.312962  | 2.507936  | -6.451883 |
| H  | -0.862427 | 2.890533  | -4.920281 |
| H  | -2.427671 | 0.710857  | -5.135921 |
| H  | -1.230103 | -1.007936 | -6.821756 |
| H  | 1.947648  | -1.347133 | -1.286464 |
| H  | 2.622087  | 1.237648  | -1.642244 |
| H  | 0.371695  | 2.623586  | -2.125781 |
| H  | -1.696772 | 0.897965  | -2.074955 |
| H  | -0.721211 | -1.549132 | -1.535125 |
| H  | 2.786187  | -2.972076 | -4.562942 |
| H  | 2.426649  | -1.943190 | -6.011634 |
| H  | 1.062455  | -2.162469 | -4.551482 |
| H  | 3.728269  | -1.090252 | -3.355998 |
| H  | 3.975803  | 1.133078  | -4.302161 |
| H  | 3.133684  | 0.605469  | -5.862548 |
| H  | -1.966494 | -2.267633 | -4.078301 |
| H  | -0.338635 | -3.842031 | -3.262153 |
| H  | -0.696246 | -3.589587 | -5.631281 |

E = -545.313522788

G = -545.093326

**Cp<sub>2</sub>SmSiH<sub>3</sub> + SiH<sub>4</sub> : Si-H activation (Si at  $\alpha$  position at the TS)**

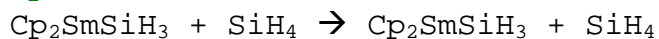

*Transition state*

|    |           |           |           |
|----|-----------|-----------|-----------|
| Sm | -0.004736 | -0.328300 | -0.013216 |
| Si | -2.736871 | -1.382081 | 0.028548  |
| H  | -1.016412 | -2.329166 | 0.053818  |
| Si | 0.470446  | -3.387425 | 0.081031  |
| H  | -3.556055 | -1.660258 | 1.251298  |
| H  | -2.605990 | 0.157416  | -0.023961 |
| H  | -3.563786 | -1.741811 | -1.167423 |
| C  | 1.730804  | 0.176175  | 2.021977  |
| C  | 0.966966  | 1.366928  | 1.889245  |
| C  | -0.356642 | 1.085970  | 2.309236  |
| C  | -0.415823 | -0.277234 | 2.698351  |
| C  | 0.878092  | -0.837854 | 2.527071  |
| C  | 1.724863  | 0.039647  | -2.082726 |
| C  | 0.864073  | -0.998191 | -2.521599 |
| C  | -0.427344 | -0.441397 | -2.721350 |
| C  | -0.358646 | 0.942677  | -2.416577 |
| C  | 0.968518  | 1.240841  | -2.020240 |
| H  | 2.790784  | 0.074650  | 1.818954  |
| H  | 1.342009  | 2.331033  | 1.566005  |
| H  | -1.173729 | 1.796789  | 2.356899  |
| H  | -1.279154 | -0.784453 | 3.111995  |
| H  | 1.174205  | -1.846051 | 2.790303  |
| H  | 2.785175  | -0.056021 | -1.878427 |
| H  | 1.152825  | -2.022552 | -2.723319 |
| H  | -1.295397 | -0.968010 | -3.099387 |
| H  | -1.171674 | 1.654308  | -2.504739 |
| H  | 1.350404  | 2.220806  | -1.758392 |
| H  | 1.965019  | -3.163557 | 0.070913  |
| H  | 0.184876  | -4.195113 | 1.312626  |
| H  | 0.179688  | -4.268793 | -1.097707 |

E = -433.728606500

G = -433.555442



**Cp<sub>2</sub>SmSiH<sub>3</sub> + SiH<sub>4</sub> : Si-H activation (Si at β position at the TS)**

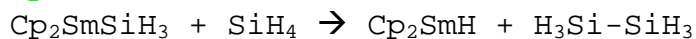

Adduct of SiH<sub>4</sub> on Cp<sub>2</sub>SmSiH<sub>3</sub>

|    |           |           |           |
|----|-----------|-----------|-----------|
| Sm | -0.156161 | -0.519788 | -0.254997 |
| C  | 2.574637  | -0.769010 | -0.126421 |
| C  | 2.180751  | -1.527122 | -1.258304 |
| C  | 1.695588  | -0.630402 | -2.243309 |
| C  | 1.799072  | 0.687830  | -1.724205 |
| C  | 2.344302  | 0.600810  | -0.418970 |
| C  | -2.140347 | -0.460832 | -2.114363 |
| C  | -2.672510 | -1.242440 | -1.057837 |
| C  | -2.883757 | -0.392457 | 0.056912  |
| C  | -2.492875 | 0.920521  | -0.316505 |
| C  | -2.032780 | 0.879349  | -1.656173 |
| H  | 3.012995  | -1.164446 | 0.781402  |
| H  | 2.256652  | -2.603357 | -1.357032 |
| H  | 1.354263  | -0.897525 | -3.236653 |
| H  | 1.550922  | 1.600735  | -2.253088 |
| H  | 2.584857  | 1.438439  | 0.225771  |
| H  | -1.907598 | -0.812114 | -3.112858 |
| H  | -2.896269 | -2.301694 | -1.098037 |
| H  | -3.309078 | -0.687374 | 1.008235  |
| H  | -2.576421 | 1.809072  | 0.298955  |
| H  | -1.701859 | 1.727493  | -2.244199 |
| H  | 1.144412  | 0.224887  | 3.621842  |
| Si | -0.041864 | 0.954673  | 3.109845  |
| Si | -0.209634 | -2.589609 | 1.756442  |
| H  | 0.018470  | 1.058068  | 1.600772  |
| H  | 0.021565  | 2.388535  | 3.537425  |
| H  | -1.332762 | 0.360571  | 3.537060  |
| H  | -0.285396 | -2.897931 | 0.199047  |
| H  | -1.420314 | -3.373841 | 2.208933  |
| H  | 0.931762  | -3.510655 | 2.122716  |

E = -433.746570748

G = -433.572852

*Transition state*

|    |           |           |           |
|----|-----------|-----------|-----------|
| Sm | -0.162119 | -0.425941 | -0.298036 |
| C  | 2.553612  | -0.774690 | -0.136272 |
| C  | 2.157245  | -1.495606 | -1.293050 |
| C  | 1.720443  | -0.562221 | -2.264826 |
| C  | 1.852007  | 0.740126  | -1.710915 |
| C  | 2.372283  | 0.607672  | -0.399382 |
| C  | -2.118341 | -0.453689 | -2.186604 |
| C  | -2.643459 | -1.241476 | -1.133433 |
| C  | -2.895310 | -0.387979 | -0.027786 |
| C  | -2.538224 | 0.933207  | -0.404958 |
| C  | -2.052847 | 0.893087  | -1.735194 |
| H  | 2.972142  | -1.200982 | 0.767418  |
| H  | 2.209304  | -2.570790 | -1.420756 |
| H  | 1.387223  | -0.795625 | -3.269357 |
| H  | 1.639067  | 1.672247  | -2.221591 |
| H  | 2.616728  | 1.420123  | 0.274129  |
| H  | -1.859608 | -0.805196 | -3.178587 |
| H  | -2.844759 | -2.305651 | -1.173007 |
| H  | -3.340217 | -0.683486 | 0.914708  |
| H  | -2.648010 | 1.820518  | 0.206758  |
| H  | -1.734205 | 1.745493  | -2.324012 |
| H  | 1.514282  | 0.335020  | 3.013388  |
| Si | 0.026541  | 0.323782  | 2.890219  |
| Si | -0.352489 | -2.160999 | 2.009998  |
| H  | -0.159618 | 0.942137  | 1.399400  |
| H  | -0.528151 | 1.617503  | 3.445603  |
| H  | -0.465885 | -0.606098 | 4.002089  |
| H  | -0.306440 | -2.755106 | 0.555043  |
| H  | -1.662106 | -2.644577 | 2.550660  |
| H  | 0.728720  | -2.887984 | 2.748508  |

E = -433.735479562

G = -433.558128

*Adduct of SiH<sub>3</sub>-SiH<sub>3</sub> on Cp<sub>2</sub>SmH*

|    |           |           |           |
|----|-----------|-----------|-----------|
| Sm | -0.162823 | -0.389068 | -0.302297 |
| C  | 2.544050  | -0.812438 | -0.136678 |
| C  | 2.119078  | -1.570184 | -1.260093 |
| C  | 1.703043  | -0.665805 | -2.267030 |
| C  | 1.875243  | 0.654395  | -1.768166 |
| C  | 2.401187  | 0.562431  | -0.455934 |
| C  | -2.110686 | -0.335837 | -2.205745 |
| C  | -2.634386 | -1.175121 | -1.192872 |
| C  | -2.896850 | -0.373952 | -0.049976 |
| C  | -2.544901 | 0.964261  | -0.362691 |
| C  | -2.052528 | 0.988052  | -1.690848 |
| H  | 2.961550  | -1.212303 | 0.779871  |
| H  | 2.142356  | -2.650608 | -1.344578 |
| H  | 1.356663  | -0.931015 | -3.259123 |
| H  | 1.682938  | 1.570393  | -2.314898 |
| H  | 2.667271  | 1.394147  | 0.184526  |
| H  | -1.843873 | -0.639410 | -3.211310 |
| H  | -2.833056 | -2.236709 | -1.285106 |
| H  | -3.344328 | -0.713774 | 0.876540  |
| H  | -2.654116 | 1.819484  | 0.292551  |
| H  | -1.733705 | 1.868676  | -2.236584 |
| H  | 1.316115  | 0.810013  | 3.138467  |
| Si | -0.030940 | 0.227114  | 2.842408  |
| Si | -0.249023 | -2.097501 | 2.131766  |
| H  | -0.021333 | 1.010073  | 1.305250  |
| H  | -1.234118 | 1.030878  | 3.227994  |
| H  | -0.076114 | -0.775511 | 4.060423  |
| H  | -0.334506 | -2.610220 | 0.648346  |
| H  | -1.502297 | -2.602396 | 2.762017  |
| H  | 0.935171  | -2.808820 | 2.692521  |

E = -433.738486018

G = -433.561621

*H<sub>3</sub>Si-SiH<sub>3</sub>*

|    |           |           |           |
|----|-----------|-----------|-----------|
| Si | 0.054504  | -0.057069 | -0.028662 |
| H  | -0.019671 | 0.029807  | 1.462234  |
| H  | 1.493141  | -0.011128 | -0.433628 |
| H  | -0.514318 | -1.372820 | -0.454149 |
| Si | -1.140894 | 1.720166  | -1.020872 |
| H  | -0.572087 | 3.035881  | -0.595397 |
| H  | -1.066730 | 1.633288  | -2.511717 |
| H  | -2.579493 | 1.674223  | -0.615907 |

E = -11.3961950618

G = -11.374637

**Cp<sub>2</sub>SmCH<sub>2</sub>CH (CH<sub>3</sub>) SiH<sub>3</sub>**

|    |           |          |           |
|----|-----------|----------|-----------|
| C  | 1.311159  | 3.059110 | 1.015444  |
| C  | 1.152504  | 4.368170 | 0.502083  |
| C  | 0.657451  | 4.258942 | -0.823328 |
| C  | 0.527544  | 2.879941 | -1.132716 |
| C  | 0.922559  | 2.137991 | 0.005666  |
| Sm | -1.424300 | 3.403352 | 0.733628  |
| C  | -3.188012 | 1.906148 | -0.760464 |
| C  | -3.240606 | 3.212200 | -1.310499 |
| C  | -3.864858 | 4.062483 | -0.359949 |
| C  | -4.192803 | 3.285384 | 0.775411  |
| C  | -3.772105 | 1.952423 | 0.530309  |
| C  | -1.629699 | 5.303723 | 2.354482  |
| C  | -0.867139 | 5.052603 | 3.672723  |
| C  | -1.031150 | 6.133935 | 4.751242  |
| Si | -1.443896 | 3.342588 | 4.234399  |
| H  | -1.301153 | 2.387899 | 3.043779  |
| H  | -4.695827 | 3.642018 | 1.665740  |
| H  | -3.919046 | 1.107448 | 1.194238  |
| H  | -2.799763 | 1.023118 | -1.254946 |
| H  | -2.910141 | 3.498186 | -2.302411 |
| H  | -4.076670 | 5.117596 | -0.489947 |
| H  | 0.202291  | 2.467903 | -2.080611 |
| H  | 0.968062  | 1.056748 | 0.076408  |
| H  | 1.705208  | 2.801391 | 1.992036  |
| H  | 1.387857  | 5.289636 | 1.019453  |
| H  | 0.467793  | 5.083435 | -1.501795 |
| H  | -2.082661 | 6.245046 | 5.040394  |
| H  | -0.700700 | 7.104613 | 4.361459  |
| H  | -0.451305 | 5.923711 | 5.659514  |
| H  | 0.207378  | 4.943098 | 3.457308  |
| H  | -2.688744 | 5.496798 | 2.590326  |
| H  | -1.257872 | 6.237270 | 1.897071  |
| H  | -2.899653 | 3.308618 | 4.574495  |
| H  | -0.679488 | 2.656850 | 5.326702  |

E = -545.343148018

G = -545.119505

**Cp<sub>2</sub>SmCH<sub>2</sub>CH(CH<sub>3</sub>)SiH<sub>3</sub> + propene : 1,2 insertion**

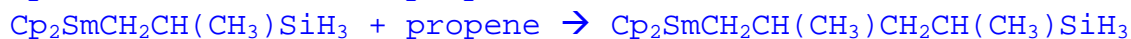

*Transition state*

|    |           |          |           |
|----|-----------|----------|-----------|
| C  | -3.894725 | 2.551219 | 1.109454  |
| C  | -3.589843 | 2.784594 | 2.470915  |
| C  | -2.626839 | 1.826325 | 2.874101  |
| C  | -2.338145 | 1.000770 | 1.760487  |
| C  | -3.115230 | 1.453073 | 0.664181  |
| Sm | -1.238392 | 3.431096 | 1.091453  |
| C  | 0.458273  | 1.678024 | -0.200670 |
| C  | 1.124031  | 2.003156 | 1.008565  |
| C  | 1.551204  | 3.351492 | 0.922411  |
| C  | 1.136535  | 3.865227 | -0.327603 |
| C  | 0.458641  | 2.828427 | -1.023764 |
| C  | -0.635240 | 4.726764 | 3.157321  |
| C  | -1.068380 | 5.926511 | 2.526091  |
| C  | -0.025926 | 6.953930 | 2.149554  |
| C  | -2.254998 | 5.836805 | 0.758406  |
| C  | -2.126377 | 5.575858 | -0.760899 |
| C  | -3.501326 | 5.542981 | -1.459001 |
| Si | -1.053018 | 6.904554 | -1.619657 |
| H  | 1.350231  | 4.855517 | -0.710473 |
| H  | 0.066079  | 2.886520 | -2.032976 |
| H  | 0.041792  | 0.712021 | -0.458741 |
| H  | 1.315488  | 1.325372 | 1.832523  |
| H  | 2.125355  | 3.884074 | 1.670151  |
| H  | -1.661161 | 0.155225 | 1.755196  |
| H  | -3.148601 | 1.004116 | -0.321889 |
| H  | -4.631815 | 3.086269 | 0.522190  |
| H  | -4.035303 | 3.543542 | 3.103494  |
| H  | -2.209218 | 1.721720 | 3.868411  |
| H  | 0.816170  | 6.496042 | 1.622695  |
| H  | 0.371493  | 7.402746 | 3.068604  |
| H  | -0.421168 | 7.760488 | 1.525730  |
| H  | -1.982982 | 6.357185 | 2.931257  |
| H  | 0.435579  | 4.587977 | 3.289704  |
| H  | -1.255440 | 4.328020 | 3.956684  |
| H  | -2.371570 | 6.909418 | 0.914267  |
| H  | -3.188671 | 5.381753 | 1.129180  |
| H  | -1.627596 | 4.614460 | -1.028861 |
| H  | -3.412848 | 5.332523 | -2.531723 |
| H  | -4.015658 | 6.503565 | -1.345840 |
| H  | -4.146534 | 4.774244 | -1.020887 |
| H  | -0.922856 | 6.589069 | -3.076857 |
| H  | -1.749747 | 8.221736 | -1.476858 |
| H  | 0.315543  | 7.030257 | -1.038514 |

E = -663.193710110

G = -662.889668

**Cp<sub>2</sub>SmCH<sub>2</sub>CH(CH<sub>3</sub>)SiH<sub>3</sub> + propene : allylic activation**

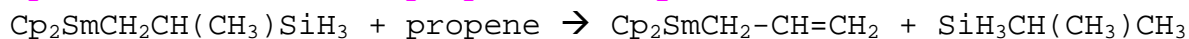

*Transition state*

|    |           |           |           |
|----|-----------|-----------|-----------|
| C  | 2.013331  | -1.835285 | -5.923395 |
| C  | 0.663877  | -1.813183 | -6.348445 |
| C  | -0.114704 | -2.475210 | -5.365452 |
| C  | 0.753486  | -2.899981 | -4.331853 |
| C  | 2.071119  | -2.495366 | -4.671543 |
| Sm | 0.714325  | -0.174350 | -4.097727 |
| C  | 0.763120  | 1.386887  | -1.797750 |
| C  | 1.866745  | 0.503058  | -1.671679 |
| C  | 1.361856  | -0.807783 | -1.505466 |
| C  | -0.055215 | -0.737444 | -1.528961 |
| C  | -0.422523 | 0.620241  | -1.699568 |
| C  | -1.734372 | 0.487906  | -5.007179 |
| C  | -2.699545 | 1.660245  | -5.244251 |
| C  | -4.070446 | 1.189892  | -5.761402 |
| C  | 0.566203  | 2.196098  | -5.576014 |
| C  | 1.906208  | 1.660778  | -5.789747 |
| C  | 2.886893  | 1.551217  | -4.848760 |
| H  | -2.272066 | 2.327012  | -6.011165 |
| H  | 0.813891  | 2.464955  | -1.896970 |
| H  | 2.913600  | 0.783201  | -1.664004 |
| H  | 1.952762  | -1.703355 | -1.356309 |
| H  | -0.736547 | -1.568858 | -1.389799 |
| H  | -1.433169 | 1.006763  | -1.718045 |
| H  | 0.294179  | -1.398211 | -7.278811 |
| H  | 2.861323  | -1.439611 | -6.469648 |
| H  | 2.968717  | -2.701565 | -4.100408 |
| H  | 0.467701  | -3.463080 | -3.451651 |
| H  | -1.183319 | -2.648196 | -5.409968 |
| H  | -1.745211 | -0.151353 | -5.902451 |
| H  | -2.122960 | -0.134626 | -4.183910 |
| H  | 0.102108  | 2.559769  | -6.495144 |
| H  | 0.515923  | 2.959563  | -4.794080 |
| H  | -0.425369 | 1.352077  | -5.241399 |
| Si | -2.942606 | 2.768136  | -3.716215 |
| H  | -4.738261 | 2.028025  | -5.994933 |
| H  | -3.952314 | 0.593327  | -6.674636 |
| H  | -4.575923 | 0.555388  | -5.023962 |
| H  | 2.086471  | 1.185258  | -6.755073 |
| H  | 3.835360  | 1.078344  | -5.081258 |
| H  | 2.817416  | 2.075719  | -3.898716 |
| H  | -3.868636 | 3.902541  | -4.035488 |
| H  | -3.552647 | 1.988467  | -2.590412 |
| H  | -1.656617 | 3.357809  | -3.224836 |

E = -663.196649566

G = -662.896796

*SiH<sub>3</sub>CH(CH<sub>3</sub>)CH<sub>3</sub> ('branched' hydrosilylation product)*

|    |           |           |           |
|----|-----------|-----------|-----------|
| H  | -0.099401 | 0.071614  | 1.834539  |
| Si | -0.007402 | -0.061514 | 0.345079  |
| H  | -0.728725 | 1.096430  | -0.272652 |
| C  | 1.817838  | -0.098625 | -0.203735 |
| C  | 2.547667  | -1.313875 | 0.382081  |
| C  | 2.530174  | 1.213148  | 0.149574  |
| H  | -0.711666 | -1.321300 | -0.054938 |
| H  | 1.799968  | -0.199451 | -1.298608 |
| H  | 3.589427  | -1.347145 | 0.038884  |
| H  | 2.567857  | -1.276468 | 1.477701  |
| H  | 2.073707  | -2.257643 | 0.092310  |
| H  | 3.570781  | 1.198912  | -0.198270 |
| H  | 2.041469  | 2.081908  | -0.304051 |
| H  | 2.552447  | 1.374751  | 1.233803  |

E = -124.203530006

G = -124.114782



**Cp<sub>2</sub>SmCH<sub>2</sub>CH(CH<sub>3</sub>)SiH<sub>3</sub> + SiH<sub>4</sub> : Si-H activation (Si at α position at the TS)**

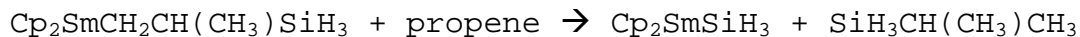

Adduct of SiH<sub>4</sub> on Cp<sub>2</sub>SmCH<sub>2</sub>CH(CH<sub>3</sub>)SiH<sub>3</sub>

|    |           |           |           |
|----|-----------|-----------|-----------|
| C  | 2.307970  | -0.780821 | 2.225301  |
| C  | 1.175620  | -0.182157 | 2.835749  |
| C  | 1.099573  | 1.163069  | 2.399775  |
| C  | 2.180555  | 1.394685  | 1.510043  |
| C  | 2.930585  | 0.193545  | 1.405817  |
| Sm | 0.566440  | -0.305862 | 0.151098  |
| C  | -0.576336 | -3.144275 | 0.892068  |
| C  | -1.417813 | -4.271551 | 0.279318  |
| Si | -0.456118 | -5.922096 | 0.269545  |
| C  | -0.203882 | 0.389496  | -2.384008 |
| C  | 1.093105  | 0.935933  | -2.200236 |
| C  | 2.020475  | -0.137276 | -2.145447 |
| C  | 1.296076  | -1.346944 | -2.284868 |
| C  | -0.077956 | -1.020175 | -2.430040 |
| Si | -2.167534 | 0.836078  | 0.682452  |
| H  | -2.730233 | 0.724624  | 2.086105  |
| H  | -3.318182 | 0.328402  | -0.165999 |
| H  | -2.229534 | 2.330914  | 0.433162  |
| H  | -1.160779 | -2.204103 | 0.879519  |
| H  | 2.422045  | 2.338059  | 1.034072  |
| H  | 0.358776  | 1.889260  | 2.709436  |
| H  | 0.502220  | -0.655786 | 3.540581  |
| H  | 2.665292  | -1.791029 | 2.393892  |
| H  | 3.842918  | 0.058889  | 0.837381  |
| H  | 3.096065  | -0.046032 | -2.053483 |
| H  | 1.724790  | -2.342424 | -2.326706 |
| H  | -0.889397 | -1.721363 | -2.588512 |
| H  | -1.122834 | 0.950336  | -2.495433 |
| H  | 1.337897  | 1.991131  | -2.160427 |
| H  | -0.324884 | -3.344609 | 1.938944  |
| H  | 0.374211  | -3.032300 | 0.342925  |
| C  | -2.763235 | -4.412485 | 1.002716  |
| H  | -1.610674 | -4.024212 | -0.773762 |
| H  | -1.258827 | -6.988219 | -0.402890 |
| H  | 0.843436  | -5.761522 | -0.457180 |
| H  | -0.162250 | -6.347269 | 1.674121  |
| H  | -3.385913 | -5.187931 | 0.545675  |
| H  | -2.623664 | -4.677902 | 2.056911  |
| H  | -3.327818 | -3.473038 | 0.971242  |

E = -551.659058150

G = -551.409909

*Transition state*

|    |           |           |           |
|----|-----------|-----------|-----------|
| C  | 2.584472  | -0.753755 | 2.202700  |
| C  | 1.350553  | -0.523568 | 2.858426  |
| C  | 0.913163  | 0.783786  | 2.523871  |
| C  | 1.881197  | 1.362852  | 1.662793  |
| C  | 2.914709  | 0.412771  | 1.463913  |
| Sm | 0.739717  | -0.627357 | 0.166864  |
| C  | -0.379157 | -2.833384 | 0.820930  |
| C  | -1.470886 | -3.745654 | 0.247375  |
| Si | -0.808211 | -5.526064 | 0.064318  |
| C  | -0.285115 | -0.327222 | -2.372759 |
| C  | 0.692516  | 0.693344  | -2.235814 |
| C  | 1.966175  | 0.074736  | -2.178709 |
| C  | 1.775965  | -1.328651 | -2.271322 |
| C  | 0.384988  | -1.575319 | -2.397096 |
| Si | -2.236212 | 0.067327  | 0.725737  |
| H  | -2.799731 | 0.185143  | 2.107205  |
| H  | -3.358806 | -0.247709 | -0.212593 |
| H  | -1.743134 | 1.443884  | 0.347530  |
| H  | -1.238499 | -1.354128 | 0.758996  |
| H  | 1.856186  | 2.369208  | 1.260465  |
| H  | 0.025088  | 1.274471  | 2.904622  |
| H  | 0.845035  | -1.211212 | 3.525163  |
| H  | 3.193134  | -1.647525 | 2.285011  |
| H  | 3.818734  | 0.566348  | 0.886304  |
| H  | 2.919468  | 0.585344  | -2.109929 |
| H  | 2.561050  | -2.076316 | -2.297134 |
| H  | -0.079110 | -2.545327 | -2.525746 |
| H  | -1.351302 | -0.174246 | -2.491653 |
| H  | 0.501766  | 1.760446  | -2.222807 |
| H  | -0.294120 | -2.986990 | 1.904454  |
| H  | 0.615545  | -3.131921 | 0.402862  |
| C  | -2.740023 | -3.733239 | 1.109345  |
| H  | -1.739677 | -3.411636 | -0.766066 |
| H  | -1.822491 | -6.460903 | -0.527430 |
| H  | 0.402565  | -5.535052 | -0.819483 |
| H  | -0.408674 | -6.060226 | 1.405423  |
| H  | -3.535117 | -4.344938 | 0.670295  |
| H  | -2.538343 | -4.119324 | 2.115604  |
| H  | -3.139034 | -2.718323 | 1.227833  |

E = -551.612781113

G = -551.364734

Adduct of  $CH_3CH(CH_3)SiH_3$  on  $Cp_2SmSiH_3$

|    |           |           |           |
|----|-----------|-----------|-----------|
| C  | 2.321168  | -1.185585 | 2.286842  |
| C  | 1.224888  | -0.550037 | 2.912888  |
| C  | 1.143798  | 0.778006  | 2.415886  |
| C  | 2.187853  | 0.959909  | 1.477553  |
| C  | 2.912732  | -0.256904 | 1.390676  |
| Sm | 0.515574  | -0.847952 | 0.241720  |
| C  | 0.244048  | -3.284461 | 0.659746  |
| C  | -0.891472 | -4.066119 | -0.030054 |
| Si | -0.785767 | -5.910030 | 0.449579  |
| C  | -0.473293 | -1.112723 | -2.339494 |
| C  | -0.301527 | 0.286105  | -2.161535 |
| C  | 1.085426  | 0.548032  | -2.058653 |
| C  | 1.772355  | -0.689258 | -2.166353 |
| C  | 0.806523  | -1.713291 | -2.350876 |
| Si | -2.557556 | 1.336994  | 1.162889  |
| H  | -2.833266 | 1.428267  | 2.621790  |
| H  | -3.816572 | 1.274145  | 0.372374  |
| H  | -1.693449 | 2.459138  | 0.706895  |
| H  | -1.826684 | 0.042547  | 0.923999  |
| H  | 2.416244  | 1.876479  | 0.946716  |
| H  | 0.446462  | 1.540717  | 2.745328  |
| H  | 0.582890  | -0.990148 | 3.667320  |
| H  | 2.652969  | -2.200877 | 2.464927  |
| H  | 3.799286  | -0.426947 | 0.790829  |
| H  | 1.544877  | 1.523167  | -1.949211 |
| H  | 2.848179  | -0.820734 | -2.167452 |
| H  | 1.013910  | -2.767161 | -2.487837 |
| H  | -1.416683 | -1.626583 | -2.482771 |
| H  | -1.090072 | 1.030800  | -2.164436 |
| H  | 0.145815  | -3.406177 | 1.753908  |
| H  | 1.218815  | -3.744858 | 0.418843  |
| C  | -2.272219 | -3.488596 | 0.301350  |
| H  | -0.759942 | -4.026162 | -1.121496 |
| H  | -1.836438 | -6.779395 | -0.190113 |
| H  | 0.549467  | -6.469718 | 0.062696  |
| H  | -0.935252 | -6.054400 | 1.935061  |
| H  | -3.089642 | -4.032185 | -0.186483 |
| H  | -2.460249 | -3.510612 | 1.382128  |
| H  | -2.350072 | -2.437457 | -0.020382 |

E = -551.627667192

G = -551.382605

**Cp<sub>2</sub>SmCH<sub>2</sub>CH(CH<sub>3</sub>)SiH<sub>3</sub> + SiH<sub>4</sub> : Si-H activation (Si at β position at the TS)**

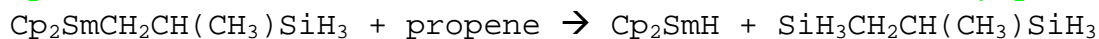

*Transition state*

|    |           |           |           |
|----|-----------|-----------|-----------|
| C  | 0.734768  | -3.828079 | -2.489900 |
| C  | 1.819015  | -2.979879 | -2.150589 |
| C  | 2.691296  | -3.706868 | -1.301318 |
| C  | 2.150170  | -5.006935 | -1.126928 |
| C  | 0.941347  | -5.081229 | -1.858413 |
| Sm | 0.380341  | -3.286861 | 0.161244  |
| C  | -1.200738 | -1.391576 | -0.966655 |
| C  | -2.053093 | -2.054515 | -0.051149 |
| C  | -1.623921 | -1.729734 | 1.261967  |
| C  | -0.502045 | -0.871948 | 1.155888  |
| C  | -0.235683 | -0.664311 | -0.222339 |
| Si | -1.449761 | -5.008926 | 2.124746  |
| C  | 0.423590  | -4.167992 | 2.732023  |
| C  | 1.857999  | -4.694901 | 2.482182  |
| Si | 1.982800  | -6.599879 | 2.664573  |
| C  | 2.867113  | -4.018163 | 3.427563  |
| H  | -2.813123 | -5.003999 | 1.442371  |
| H  | -1.110703 | -6.447974 | 2.361215  |
| H  | -1.966041 | -4.441319 | 3.450546  |
| H  | -2.097152 | -2.050976 | 2.182272  |
| H  | 0.031479  | -0.414965 | 1.982276  |
| H  | 0.531690  | -0.018586 | -0.633467 |
| H  | -1.287141 | -1.410257 | -2.045755 |
| H  | -2.899536 | -2.682909 | -0.300383 |
| H  | 3.637573  | -3.350936 | -0.907842 |
| H  | 2.604822  | -5.820041 | -0.573957 |
| H  | 0.301531  | -5.950623 | -1.943446 |
| H  | -0.084819 | -3.580008 | -3.153286 |
| H  | 1.973482  | -1.968811 | -2.507952 |
| H  | -0.923613 | -4.911681 | 0.486609  |
| H  | 2.843891  | -2.925872 | 3.320262  |
| H  | 2.628075  | -4.240038 | 4.473793  |
| H  | 3.893691  | -4.352172 | 3.240608  |
| H  | 2.227075  | -4.516975 | 1.452425  |
| H  | 0.159724  | -4.454636 | 3.755109  |
| H  | 0.429281  | -3.060256 | 2.804392  |
| H  | 1.424641  | -7.010969 | 3.988282  |
| H  | 1.279484  | -7.327495 | 1.569307  |
| H  | 3.432651  | -6.974821 | 2.618707  |

E = -551.605342753

G = -551.349882

**Cp<sub>2</sub>SmCH(CH<sub>3</sub>)CH<sub>2</sub>SiH<sub>3</sub>**

|    |           |          |           |
|----|-----------|----------|-----------|
| C  | -3.440318 | 1.820389 | 0.745778  |
| C  | -3.252318 | 2.211237 | -0.600802 |
| C  | -3.490737 | 3.607268 | -0.689196 |
| C  | -3.847831 | 4.075372 | 0.601726  |
| C  | -3.810004 | 2.973681 | 1.488992  |
| Sm | -1.170025 | 3.402861 | 0.754642  |
| C  | 0.466968  | 1.664521 | -0.613109 |
| C  | 1.200653  | 1.985177 | 0.555449  |
| C  | 1.588410  | 3.347994 | 0.471066  |
| C  | 1.093589  | 3.868700 | -0.746916 |
| C  | 0.393892  | 2.830821 | -1.417300 |
| C  | -1.022540 | 5.712593 | 1.771209  |
| C  | -1.640185 | 5.571967 | 3.184336  |
| H  | -2.713464 | 5.344310 | 3.131142  |
| Si | -0.853408 | 4.150973 | 4.149157  |
| H  | -0.813415 | 2.933151 | 3.220392  |
| H  | -4.069631 | 2.993491 | 2.541469  |
| H  | -3.363262 | 0.810005 | 1.132152  |
| H  | -2.988993 | 1.557271 | -1.423519 |
| H  | -3.464282 | 4.200811 | -1.596466 |
| H  | -4.121829 | 5.091626 | 0.856125  |
| H  | -0.065925 | 2.899934 | -2.396494 |
| H  | 0.058905  | 0.692283 | -0.864058 |
| H  | 1.462263  | 1.297360 | 1.352215  |
| H  | 2.182514  | 3.889011 | 1.197126  |
| H  | 1.245177  | 4.876749 | -1.114368 |
| H  | -1.558243 | 6.492615 | 3.791861  |
| H  | -1.706774 | 6.356581 | 1.192485  |
| C  | 0.323758  | 6.435334 | 1.845494  |
| H  | -1.616331 | 3.670911 | 5.343625  |
| H  | 0.572678  | 4.352868 | 4.541576  |
| H  | 0.258808  | 7.407357 | 2.367242  |
| H  | 1.088105  | 5.854792 | 2.380584  |
| H  | 0.731205  | 6.638156 | 0.848367  |

E = -545.337694183

G = -545.113894

**Cp<sub>2</sub>SmCH(CH<sub>3</sub>)CH<sub>2</sub>SiH<sub>3</sub> + SiH<sub>4</sub> : Si-H activation (Si at  $\alpha$  position at the TS)**

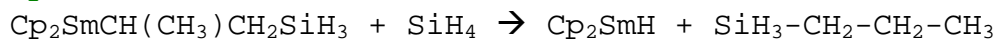

Adduct of SiH<sub>4</sub> on Cp<sub>2</sub>SmCH(CH<sub>3</sub>)CH<sub>2</sub>SiH<sub>3</sub>

|    |           |           |          |
|----|-----------|-----------|----------|
| C  | 1.915229  | -0.456589 | 2.057215 |
| C  | 0.785146  | 0.077522  | 2.723788 |
| C  | 0.702532  | 1.456654  | 2.401898 |
| C  | 1.774363  | 1.770667  | 1.525644 |
| C  | 2.524318  | 0.587787  | 1.313596 |
| Sm | 2.915750  | 1.284969  | 3.950210 |
| C  | 5.496779  | -0.776355 | 5.026070 |
| C  | 5.514428  | -2.308672 | 5.106394 |
| H  | 5.305072  | -2.618868 | 6.137209 |
| C  | 4.531088  | 3.471800  | 4.365539 |
| C  | 4.355426  | 2.905742  | 5.655904 |
| C  | 2.999036  | 3.070513  | 6.028925 |
| C  | 2.332496  | 3.728864  | 4.963363 |
| C  | 3.280480  | 3.982176  | 3.938273 |
| Si | 7.145832  | -3.151644 | 4.606999 |
| Si | 1.595254  | -0.220724 | 6.187177 |
| H  | 2.276230  | -0.240406 | 7.543034 |
| H  | 1.297121  | -1.690809 | 5.958506 |
| H  | 0.224605  | 0.330488  | 6.528643 |
| H  | 4.571232  | -0.424056 | 5.518245 |
| H  | 1.290530  | 4.026614  | 4.954340 |
| H  | 2.556850  | 2.772142  | 6.970593 |
| H  | 5.131716  | 2.465708  | 6.271354 |
| H  | 5.467866  | 3.553983  | 3.824969 |
| H  | 3.091456  | 4.509165  | 3.011070 |
| H  | 1.960927  | 2.733503  | 1.065559 |
| H  | 3.382932  | 0.489542  | 0.658106 |
| H  | 2.227721  | -1.494623 | 2.076346 |
| H  | 0.093668  | -0.475203 | 3.346459 |
| H  | -0.072370 | 2.139475  | 2.729780 |
| H  | 6.315434  | -0.356363 | 5.622545 |
| C  | 5.592279  | -0.231855 | 3.599207 |
| H  | 4.703596  | -2.731481 | 4.499087 |
| H  | 7.058922  | -4.617820 | 4.881362 |
| H  | 7.452384  | -2.967952 | 3.153467 |
| H  | 8.281170  | -2.575608 | 5.393809 |
| H  | 6.524196  | -0.527906 | 3.108111 |
| H  | 4.788650  | -0.618852 | 2.954313 |
| H  | 5.600731  | 0.870943  | 3.578242 |

E = -551.659682555

G = -551.407079

*Transition state*

|    |           |           |          |
|----|-----------|-----------|----------|
| C  | 2.281941  | -0.605501 | 2.081756 |
| C  | 1.141738  | -0.279420 | 2.858538 |
| C  | 0.795058  | 1.068700  | 2.584631 |
| C  | 1.716875  | 1.572840  | 1.632017 |
| C  | 2.636982  | 0.539270  | 1.323412 |
| Sm | 3.173943  | 1.240302  | 3.929172 |
| C  | 4.977415  | -0.539068 | 4.634859 |
| C  | 4.921704  | -2.067070 | 4.711286 |
| H  | 4.318819  | -2.389360 | 5.572512 |
| C  | 4.632196  | 3.542236  | 4.309262 |
| C  | 4.640814  | 2.903093  | 5.575397 |
| C  | 3.322018  | 2.938858  | 6.092583 |
| C  | 2.496349  | 3.598274  | 5.145144 |
| C  | 3.307125  | 3.974890  | 4.044917 |
| Si | 6.613970  | -2.925395 | 4.886583 |
| Si | 2.041388  | -0.414217 | 6.326818 |
| H  | 2.583919  | -0.303001 | 7.719442 |
| H  | 1.493629  | -1.799109 | 6.163438 |
| H  | 0.858176  | 0.513577  | 6.258992 |
| H  | 3.475412  | -0.360752 | 5.333439 |
| H  | 1.440788  | 3.814946  | 5.261959 |
| H  | 3.009003  | 2.574257  | 7.063742 |
| H  | 5.510121  | 2.497566  | 6.078754 |
| H  | 5.495937  | 3.720169  | 3.678462 |
| H  | 2.979830  | 4.528400  | 3.172660 |
| H  | 1.698928  | 2.562330  | 1.190503 |
| H  | 3.440443  | 0.600687  | 0.598049 |
| H  | 2.764043  | -1.574570 | 2.038515 |
| H  | 0.599019  | -0.956530 | 3.507379 |
| H  | -0.051787 | 1.604942  | 2.997012 |
| H  | 5.505550  | -0.140401 | 5.509876 |
| C  | 5.660563  | -0.035522 | 3.365210 |
| H  | 4.414135  | -2.479966 | 3.829127 |
| H  | 6.461652  | -4.407432 | 5.046735 |
| H  | 7.481569  | -2.682797 | 3.689894 |
| H  | 7.332763  | -2.392241 | 6.087533 |
| H  | 6.742941  | 0.101504  | 3.480126 |
| H  | 5.493448  | -0.710420 | 2.519941 |
| H  | 5.347756  | 0.979201  | 2.997618 |

E = -551.614894625

G = -551.364647

Adduct of  $\text{CH}_3\text{CH}_2\text{CH}_2\text{SiH}_3$  on  $\text{Cp}_2\text{SmSiH}_3$

|    |          |           |          |
|----|----------|-----------|----------|
| C  | 2.697032 | -0.411972 | 1.702364 |
| C  | 1.737476 | -0.744863 | 2.682628 |
| C  | 0.901821 | 0.388132  | 2.882839 |
| C  | 1.345020 | 1.415884  | 2.013919 |
| C  | 2.463084 | 0.928497  | 1.291940 |
| Sm | 3.356349 | 1.173407  | 3.880701 |
| C  | 5.082905 | -0.492545 | 4.527561 |
| C  | 4.816506 | -2.002573 | 4.451698 |
| H  | 4.020100 | -2.305823 | 5.145099 |
| C  | 4.750907 | 3.529035  | 4.104678 |
| C  | 4.857429 | 2.941933  | 5.392476 |
| C  | 3.574570 | 2.971083  | 5.989808 |
| C  | 2.672179 | 3.572887  | 5.074462 |
| C  | 3.401838 | 3.921439  | 3.910388 |
| Si | 6.349659 | -3.051378 | 4.880501 |
| Si | 1.477322 | -0.148256 | 6.783713 |
| H  | 1.970465 | 0.031009  | 8.177242 |
| H  | 0.753678 | -1.441157 | 6.635032 |
| H  | 0.593471 | 0.986892  | 6.397761 |
| H  | 2.687916 | -0.193216 | 5.885603 |
| H  | 1.622391 | 3.776643  | 5.252293 |
| H  | 3.336836 | 2.639278  | 6.994443 |
| H  | 5.764793 | 2.569501  | 5.851535 |
| H  | 5.567829 | 3.696164  | 3.411834 |
| H  | 3.005027 | 4.428834  | 3.038868 |
| H  | 0.894410 | 2.395178  | 1.904205 |
| H  | 3.002550 | 1.461192  | 0.516852 |
| H  | 3.463551 | -1.070925 | 1.312371 |
| H  | 1.638479 | -1.706272 | 3.172685 |
| H  | 0.032695 | 0.435106  | 3.529387 |
| H  | 5.544845 | -0.236104 | 5.488105 |
| C  | 5.925652 | 0.059410  | 3.388730 |
| H  | 4.460024 | -2.292380 | 3.454752 |
| H  | 6.104865 | -4.532455 | 4.806866 |
| H  | 7.492077 | -2.740845 | 3.961018 |
| H  | 6.797435 | -2.735282 | 6.275904 |
| H  | 6.827006 | 0.591170  | 3.709417 |
| H  | 6.219584 | -0.700794 | 2.655462 |
| H  | 5.404437 | 0.830155  | 2.731470 |

E = -551.626443078

G = -551.378067
